# Supplementary material for: Multimorbidity, health service use, and health insurance by socioeconomic groups in 31 countries: a multi-cohort study
Source: Research Square preprint supplement (doi:10.21203/rs.3.rs-6379381/v1), 2025-04-10
Supplement: Supplementary file 1 [file 7ba3872c0bbedccaf36e3aa6.docx]

**Appendix Tables**

Appendix Table 1. The definition of physical, psychological and cognitive disorder.

|  |  | HRS (2008–2020) | SHARE (2008-2019) | KLOSA (2006-2020) | CHARLS (2011-2018) | MHAS (2001-2018) | JSTAR (2007-2011) |
| --- | --- | --- | --- | --- | --- | --- | --- |
| Physical disorder | Yes | hypertension, diabetes, stroke, heart problem, arthritis, lung disease, cancer | | | | | |
|  | No | Did not report above mentioned physical chronic condition. | | | | | |
| Psychological disorder | Yes | A CESD-8 score of greater than 3 1 | EURO-D score ≥4 2 | CES-D10 score >=10 3 | Total CES-D score>=10 4,5 | MHAS screening questionnaire total score of ≥5 points 6 | CES-D10 score >=10 7 |
|  | No | <4 | <4 | <10 | <10 | <5 | <10 |
| Cognitive disorder | Yes | The Harmonized Cognitive Assessment Protocol (HCAP) of 10 or below 8 | Scored 1.5 SD below the age graded mean on both the SHARE memory and verbal fluency tasks 9 | K-MMSE≤23 10 | A TICS score of 11 or less 11 | CCCE (Cross-Cultural Cognitive Examination) 1.5 SD below the mean of sum score | Scored 1.5 SD below the age graded mean on both the word recall 12 |
|  | No | >11 | >11 | >11 | Otherwise | >23 | >11 |

Appendix Table 2. The definition of health care use.

| Dataset | Outpatient | Outpatient visits | Inpatient | Inpatient visits |
| --- | --- | --- | --- | --- |
| **HRS** | Whether the Respondent reports any doctor visit since the last interview, or the last 2 years for new interviewees 1. | The times has respondent seen or talked to a medical doctor about health, including emergency room or clinic visits since last interview or last two years before death. | whether the respondent reports any overnight hospital stay since the last interview, or the last 2 years for new interviewees 2. | The number of stays in a hospital between the last core interview and death. |
| **CHARLS** | Whether the respondent reported visiting a public hospital, private hospital, public health center, clinic, or health worker’s or doctor’s practice, or receiving a visit from a health worker or doctor for outpatient care in the past month 3. | The number of outpatient visits to the specified medical facilities in the past month. | Whether the respondent reported receiving any inpatient care in the past year. | The number of inpatient care episodes in the past year. |
| **JSTAR** | Whether the respondent reported any utilization of medical centers in the previous year. | The number of visits to medical centers and primary care facilities reported per month. | Whether the respondent reported any overnight hospital stay in the previous year. | The number of overnight hospital stays reported. |
| **KLoSA** | Whether the respondent reported visiting a public health clinic or consulting a medical doctor since the previous interview (typically 2 years prior) 4. | The total number of visits to public health clinics and medical doctors since the last interview. | Whether the respondent reported being hospitalized in a hospital, nursing home, convalescent home, or other long-term care facility since the previous interview 5. | The number of hospitalizations in a hospital, nursing home, convalescent home, or long-term care facility reported since the previous interview. |
| **MAHS** | Whether the respondent reported at least one doctor visit in the past 12 months | The number of doctor visits reported in the past 12 months. | Whether the respondent reported at least one overnight hospital stay in the past 12 months. | - |
| **SHARE** | Whether the respondent reported any doctor visit in the past 12 months. | The number of doctor visits reported in the past 12 months. | Whether the respondent reported any overnight hospital stay in the past 12 months. | The number of hospital stays reported in the past 12 months. |
| Note: 1 4 The unit of measurement for outpatient care in HRS and KLoSA is two years. 2 5 The unit of measurement for inpatient care in HRS and KLoSA is two years. 3 The unit of measurement for outpatient care in CHARLS is one month. | | | | |

Appendix Table 3. The definition of health insurance.

| **Dataset** | **Health insurance** |
| --- | --- |
| **HRS** | Whether the respondent is covered by government health insurance Medicare, Medicaid, private health insurance or other health insurance. |
| **CHARLS** | Whether the respondent is covered by any public health insurance program, private health insurance program, or any other health insurance program. |
| **JSTAR** | **-** |
| **KLoSA** | Whether the respondent is covered by a government health insurance program or private health insurance to compensate for hospital expenses. |
| **MAHS** | Whether the respondent is covered by a government health insurance program, private medical health insurance, or health insurance as a current or former worker. |
| **SHARE** | Whether the respondent is covered by a government health insurance program, such as the National Health Insurance System. |
| *Note:* for JSTAR, the health insurance data is not available. | |

Appendix Table 4. The definition of lifestyles.

| **Dataset** | Alcohol use | Tobacco use | Physical exercise |
| --- | --- | --- | --- |
| **HRS** | Whether the respondent has ever consumed alcoholic beverages. | Whether the respondent currently smokes. | The frequency of moderately energetic physical activity (hardly ever or never = 0). |
| **ELSA** | Whether the respondent has consumed an alcoholic drink in the last 12 months. | Whether the respondent has ever smoked. | The frequency of moderately energetic physical activity (hardly ever or never = 0). |
| **SHARE** | Whether the respondent consumes alcohol weekly or has had an alcoholic drink in the last 7 days, depending on the wave. | Whether the respondent currently smokes cigarettes, pipes, or cigars. | The frequency of vigorous and moderately energetic physical activity (hardly ever or never = 0). |
| **KLoSA** | Whether the respondent currently drinks alcoholic beverages. | Whether the respondent currently smokes. | Whether the respondent exercises more than once a week. |
| **MHAS** | Whether the respondent has ever consumed alcoholic beverages. | Whether the respondent currently smokes. | Whether the respondent has engaged in hard physical work three or more times a week on average over the past two years. |
| **CHARLS** | Whether the respondent has consumed alcoholic beverages in the past. | Whether the respondent currently smokes, only asked if they report ever smoking. | Whether the respondent engages in moderately energetic physical activity for at least 10 minutes every week. |

Appendix Table 5. Basic demographics by country.

| Variable | United States | China | Japan | South Korea | Mexico | Austria | Germany | Sweden | Netherlands | Spain |
| --- | --- | --- | --- | --- | --- | --- | --- | --- | --- | --- |
| Gender, n (%) |  |  |  |  |  |  |  |  |  |  |
| Male | 129543 (44.24) | 43245 (49.35) | 10236 (47.92) | 37908 (43.85) | 58163 (45.1) | 15737 (42.22) | 24489 (46.65) | 18732 (46.77) | 18183 (46.1) | 24174 (45.94) |
| Female | 163270 (55.76) | 44389 (50.65) | 11123 (52.08) | 48542 (56.15) | 70797 (54.9) | 21538 (57.78) | 28002 (53.35) | 21322 (53.23) | 21256 (53.9) | 28446 (54.06) |
| Age, mean (SD) | 67.79 (10.92) | 62.8 (9.01) | 64.35 (7.25) | 67.11 (10.31) | 64.86 (10.13) | 68.15 (9.76) | 66.66 (9.68) | 70.25 (9.18) | 66.92 (9.58) | 69.64 (10.71) |
| Education attainment, n (%) |  |  |  |  |  |  |  |  |  |  |
| Middle school or below | 88836 (30.35) | 76272 (87.17) | 5601 (26.38) | 14719 (17.03) | 106835 (84) | 9618 (25.8) | 7809 (14.88) | 17127 (42.76) | 19919 (50.51) | 41987 (79.79) |
| High school | 82412 (28.16) | 6846 (7.82) | 9288 (43.74) | 22600 (26.15) | 3736 (2.94) | 17178 (46.08) | 28476 (54.25) | 8769 (21.89) | 9552 (24.22) | 4625 (8.79) |
| College or above | 121416 (41.49) | 4380 (5.01) | 6344 (29.88) | 49108 (56.82) | 16613 (13.06) | 10479 (28.11) | 16206 (30.87) | 14158 (35.35) | 9968 (25.27) | 6008 (11.42) |
| Marital Status |  |  |  |  |  |  |  |  |  |  |
| Not married | 55519 (43.32) | 9556 (15.29) | 2642 (20.48) | 14605 (24.23) | 27558 (38.67) | 6748 (39.36) | 5073 (27.91) | 5379 (33.91) | 2483 (28.23) | 6001 (26.71) |
| Married | 72647 (56.68) | 52922 (84.71) | 10258 (79.52) | 45667 (75.77) | 43710 (61.33) | 10397 (60.64) | 13105 (72.09) | 10484 (66.09) | 6312 (71.77) | 16469 (73.29) |
| Work status, n (%) |  |  |  |  |  |  |  |  |  |  |
| No | 79766 (62.44) | 24492 (40.01) | 6092 (47.12) | 36908 (61.23) | 42752 (60.21) | 13086 (77.52) | 10847 (60.35) | 9506 (60.74) | 5479 (63.29) | 17373 (78.06) |
| Yes | 47987 (37.56) | 36718 (59.99) | 6836 (52.88) | 23365 (38.77) | 28252 (39.79) | 3795 (22.48) | 7127 (39.65) | 6145 (39.26) | 3178 (36.71) | 4882 (21.94) |
| Household Wealth |  |  |  |  |  |  |  |  |  |  |
| Q1 | 31641 (24.66) | 10439 (26.51) | 2049 (25.2) | 15881 (26.71) | 18054 (24.94) | 3633 (25.04) | 3810 (25) | 3440 (24.97) | 2207 (25.08) | 4788 (24.98) |
| Q2 | 31829 (24.81) | 10195 (25.89) | 2037 (25.06) | 14053 (23.63) | 18040 (24.92) | 3647 (25.13) | 3802 (24.94) | 3441 (24.98) | 2196 (24.96) | 4806 (25.07) |
| Q3 | 32281 (25.16) | 9503 (24.13) | 2027 (24.93) | 14831 (24.94) | 18132 (25.05) | 3633 (25.04) | 3815 (25.03) | 3445 (25.01) | 2202 (25.03) | 4789 (24.98) |
| Q4 | 32553 (25.37) | 9245 (23.48) | 2017 (24.81) | 14700 (24.72) | 18154 (25.08) | 3597 (24.79) | 3815 (25.03) | 3449 (25.04) | 2194 (24.93) | 4785 (24.96) |
| Alcohol use, n (%) |  |  |  |  |  |  |  |  |  |  |
| No | 58194 (45.38) | 34115 (55.01) | 5237 (55.83) | 39804 (66.04) | 52763 (74.07) | 6707 (46.58) | 6616 (43.54) | 5525 (40.25) | 3089 (35.3) | 12328 (64.54) |
| Yes | 70031 (54.62) | 27898 (44.99) | 4143 (44.17) | 20468 (33.96) | 18475 (25.93) | 7693 (53.42) | 8580 (56.46) | 8201 (59.75) | 5661 (64.7) | 6774 (35.46) |
| Tobacco use, n (%) |  |  |  |  |  |  |  |  |  |  |
| No | 110269 (86.5) | 42944 (73.44) | 9651 (80.33) | 51785 (85.92) | 61563 (86.46) | 9018 (81.48) | 8774 (82.02) | 8467 (88.62) | 7352 (84) | 11779 (87.4) |
| Yes | 17212 (13.5) | 15530 (26.56) | 2363 (19.67) | 8486 (14.08) | 9638 (13.54) | 2050 (18.52) | 1923 (17.98) | 1087 (11.38) | 1400 (16) | 1698 (12.6) |
| Physical exercise, n (%) |  |  |  |  |  |  |  |  |  |  |
| No | 29825 (23.3) | 17436 (49.57) | 702 (3.29) | 38974 (64.66) | 41888 (63.87) | 1643 (11.41) | 1412 (9.29) | 871 (6.35) | 809 (9.24) | 3847 (20.14) |
| Yes | 98180 (76.7) | 17740 (50.43) | 20657 (96.71) | 21299 (35.34) | 23695 (36.13) | 12759 (88.59) | 13783 (90.71) | 12856 (93.65) | 7944 (90.76) | 15255 (79.86) |
| BMI, n (%) |  |  |  |  |  |  |  |  |  |  |
| Underweight | 441 (1.02) | 2413 (7.03) | 641 (5.05) | 2308 (3.92) | 85 (1.36) | 244 (1.45) | 175 (.98) | 179 (1.15) | 76 (.89) | 197 (.95) |
| Normal weight | 8802 (20.32) | 13763 (40.09) | 8950 (70.52) | 25631 (43.52) | 1655 (26.57) | 6320 (37.56) | 6373 (35.55) | 6728 (43.33) | 3559 (41.55) | 6682 (32.15) |
| Overweight | 34081 (78.67) | 18150 (52.88) | 3100 (24.43) | 30959 (52.56) | 4490 (72.07) | 10262 (60.99) | 11379 (63.47) | 8619 (55.51) | 4930 (57.56) | 13902 (66.9) |
| Multimorbidity, n (%) |  |  |  |  |  |  |  |  |  |  |
| None | 16568 (12.91) | 48950 (55.84) | 5170 (40.47) | 6858 (12.75) | 13940 (19.56) | 3786 (26.09) | 3054 (20.04) | 3343 (24.27) | 2659 (30.22) | 3755 (19.59) |
| Phy | 84601 (65.94) | 7071 (8.07) | 4876 (38.17) | 6417 (11.93) | 22296 (31.28) | 7571 (52.18) | 8347 (54.76) | 7667 (55.66) | 4422 (50.26) | 8583 (44.78) |
| Psy | 2137 (1.67) | 14700 (16.77) | 1123 (8.79) | 11244 (20.91) | 4753 (6.67) | 551 (3.8) | 578 (3.79) | 548 (3.98) | 411 (4.67) | 631 (3.29) |
| Cog | 83 (.06) | 4588 (5.23) | 96 (.75) | 794 (1.48) | 2657 (3.73) | 40 (.28) | 27 (.18) | 27 (.2) | 27 (.31) | 174 (.91) |
| Phy + Psy | 22994 (17.92) | 6538 (7.46) | 1316 (10.3) | 14124 (26.26) | 15061 (21.13) | 2342 (16.14) | 2998 (19.67) | 2036 (14.78) | 1145 (13.01) | 4328 (22.58) |
| Phy + Cog | 1312 (1.02) | 1205 (1.37) | 112 (.88) | 1638 (3.05) | 5296 (7.43) | 92 (.63) | 111 (.73) | 83 (.6) | 76 (.86) | 626 (3.27) |
| Psy + Cog | 31 (.02) | 3250 (3.71) | 27 (.21) | 3235 (6.01) | 1284 (1.8) | 21 (.14) | 19 (.12) | 7 (.05) | 12 (.14) | 96 (.5) |
| Phy + Psy + Cog | 578 (.45) | 1364 (1.56) | 54 (.42) | 9475 (17.62) | 5984 (8.4) | 107 (.74) | 108 (.71) | 64 (.46) | 47 (.53) | 975 (5.09) |
| Outpatient, n (%) |  |  |  |  |  |  |  |  |  |  |
| No | 12187 (9.56) | 50252 (81.15) | 3376 (30.1) | 10313 (20.31) | 20192 (28.43) | 1472 (8.67) | 1008 (5.57) | 2386 (15.23) | 1228 (14.09) | 1943 (8.76) |
| Yes | 115314 (90.44) | 11671 (18.85) | 7840 (69.9) | 40471 (79.69) | 50836 (71.57) | 15512 (91.33) | 17083 (94.43) | 13284 (84.77) | 7488 (85.91) | 20241 (91.24) |
| Inpatient, n (%) |  |  |  |  |  |  |  |  |  |  |
| No | 94459 (74.18) | 52810 (85.15) | 10176 (90.58) | 44784 (88.03) | 62414 (87.75) | 13014 (76.1) | 14345 (79.11) | 13580 (85.67) | 7732 (88.22) | 19693 (87.65) |
| Yes | 32871 (25.82) | 9212 (14.85) | 1058 (9.42) | 6090 (11.97) | 8713 (12.25) | 4087 (23.9) | 3788 (20.89) | 2272 (14.33) | 1032 (11.78) | 2774 (12.35) |
| Outpatient visits, median (IQR) | 3 (1, 5) | 0 (0, 0) | 0 (0, 2) | 4 (1, 8.5) | 3 (0, 11) | 5 (2, 10) | 5 (3, 10) | 2 (1, 5) | 3 (1, 7) | 4 (2, 7) |
| Inpatient visits, median (IQR) | 0 (0, 1) | 0 (0, 0) | 0 (0, 0) | 0 (0, 0) |  | 0 (0, 0) | 0 (0, 0) | 0 (0, 0) | 0 (0, 0) | 0 (0, 0) |

Appendix Table 5: Basic demographics by country (Continued).

| Variable | Italy | France | Denmark | Greece | Switzerland | Belgium | Israel | Czech Republic | Poland | Luxembourg | Hungary |
| --- | --- | --- | --- | --- | --- | --- | --- | --- | --- | --- | --- |
| Gender, n (%) |  |  |  |  |  |  |  |  |  |  |  |
| Male | 23281 (45.78) | 21919 (43.92) | 16143 (46.16) | 17196 (43.43) | 12580 (45.77) | 26771 (45.48) | 10849 (44.77) | 21936 (42.62) | 17156 (45.3) | 6046 (46.52) | 8068 (43.24) |
| Female | 27575 (54.22) | 27987 (56.08) | 18826 (53.84) | 22396 (56.57) | 14907 (54.23) | 32092 (54.52) | 13383 (55.23) | 29538 (57.38) | 20716 (54.7) | 6950 (53.48) | 10591 (56.76) |
| Age, mean (SD) | 67.64 (9.82) | 67.79 (10.6) | 66.06 (10.06) | 68.41 (9.9) | 67.73 (9.88) | 66.48 (10.57) | 69.7 (9.89) | 67.81 (9.04) | 66.5 (9.67) | 65.72 (9.44) | 66.67 (9.09) |
| Education attainment, n (%) |  |  |  |  |  |  |  |  |  |  |  |
| Middle school or below | 35412 (69.63) | 23546 (47.18) | 7526 (21.52) | 22185 (56.03) | 6606 (24.03) | 25293 (42.97) | 8783 (36.25) | 22373 (43.46) | 12950 (34.19) | 6065 (46.67) | 5826 (31.22) |
| High school | 9925 (19.52) | 16540 (33.14) | 13639 (39) | 9392 (23.72) | 12253 (44.58) | 15274 (25.95) | 5980 (24.68) | 21616 (41.99) | 19008 (50.19) | 4261 (32.79) | 8503 (45.57) |
| College or above | 5519 (10.85) | 9820 (19.68) | 13804 (39.47) | 8015 (20.24) | 8628 (31.39) | 18296 (31.08) | 9469 (39.08) | 7485 (14.54) | 5914 (15.62) | 2670 (20.54) | 4330 (23.21) |
| Marital Status |  |  |  |  |  |  |  |  |  |  |  |
| Not married | 4841 (24.19) | 7514 (38.23) | 4867 (31.78) | 2989 (27.6) | 4574 (33.4) | 8749 (37.67) | 2199 (29.03) | 8360 (37.07) | 3016 (29.51) | 1328 (25) | 1938 (36.57) |
| Married | 15172 (75.81) | 12141 (61.77) | 10449 (68.22) | 7842 (72.4) | 9121 (66.6) | 14476 (62.33) | 5376 (70.97) | 14194 (62.93) | 7204 (70.49) | 3985 (75) | 3362 (63.43) |
| Work status, n (%) |  |  |  |  |  |  |  |  |  |  |  |
| No | 15255 (76.68) | 13891 (71.88) | 7792 (51.68) | 8297 (76.9) | 7504 (55.66) | 15630 (69.06) | 4803 (64.32) | 15953 (71.8) | 7589 (74.69) | 3908 (75.15) | 4140 (78.93) |
| Yes | 4640 (23.32) | 5434 (28.12) | 7284 (48.32) | 2493 (23.1) | 5978 (44.34) | 7004 (30.94) | 2664 (35.68) | 6266 (28.2) | 2572 (25.31) | 1292 (24.85) | 1105 (21.07) |
| Household Wealth |  |  |  |  |  |  |  |  |  |  |  |
| Q1 | 4271 (24.99) | 4338 (24.8) | 3354 (25.05) | 2442 (25.17) | 3019 (25.02) | 4982 (24.96) | 1377 (25) | 4837 (25.04) | 1693 (25.15) | 1011 (24.78) | 948 (25.15) |
| Q2 | 4289 (25.1) | 4380 (25.04) | 3347 (25) | 2417 (24.91) | 3019 (25.02) | 4996 (25.03) | 1370 (24.88) | 4849 (25.1) | 1681 (24.97) | 1024 (25.1) | 943 (25.01) |
| Q3 | 4263 (24.95) | 4391 (25.1) | 3352 (25.03) | 2429 (25.03) | 3010 (24.94) | 5006 (25.08) | 1376 (24.99) | 4814 (24.92) | 1682 (24.99) | 1026 (25.15) | 943 (25.01) |
| Q4 | 4265 (24.96) | 4383 (25.06) | 3337 (24.92) | 2415 (24.89) | 3019 (25.02) | 4976 (24.93) | 1384 (25.13) | 4818 (24.94) | 1675 (24.88) | 1019 (24.98) | 936 (24.83) |
| Alcohol use, n (%) |  |  |  |  |  |  |  |  |  |  |  |
| No | 9989 (58.58) | 6612 (38.02) | 3461 (25.95) | 5071 (52.35) | 3742 (31.16) | 7164 (36.17) | 4655 (85.12) | 10836 (56.37) | 5084 (75.74) | 1446 (35.55) | 2728 (73.1) |
| Yes | 7064 (41.42) | 10777 (61.98) | 9878 (74.05) | 4616 (47.65) | 8268 (68.84) | 12641 (63.83) | 814 (14.88) | 8387 (43.63) | 1628 (24.26) | 2621 (64.45) | 1004 (26.9) |
| Tobacco use, n (%) |  |  |  |  |  |  |  |  |  |  |  |
| No | 10735 (84.61) | 11522 (84.97) | 7560 (80.2) | 5500 (77.05) | 7329 (80.92) | 12078 (82.17) | 3118 (87.22) | 11255 (78.3) | 3804 (76.77) | 2533 (84.91) | 2946 (78.9) |
| Yes | 1952 (15.39) | 2038 (15.03) | 1866 (19.8) | 1638 (22.95) | 1728 (19.08) | 2620 (17.83) | 457 (12.78) | 3120 (21.7) | 1151 (23.23) | 450 (15.09) | 788 (21.1) |
| Physical exercise, n (%) |  |  |  |  |  |  |  |  |  |  |  |
| No | 4238 (24.85) | 2329 (13.4) | 958 (7.18) | 987 (10.19) | 867 (7.22) | 2770 (13.99) | 1468 (26.91) | 2330 (12.12) | 1421 (21.17) | 406 (9.96) | 650 (17.41) |
| Yes | 12815 (75.15) | 15058 (86.6) | 12378 (92.82) | 8701 (89.81) | 11143 (92.78) | 17034 (86.01) | 3987 (73.09) | 16898 (87.88) | 5290 (78.83) | 3669 (90.04) | 3084 (82.59) |
| BMI, n (%) |  |  |  |  |  |  |  |  |  |  |  |
| Underweight | 259 (1.32) | 397 (2.07) | 293 (1.96) | 45 (.42) | 303 (2.25) | 433 (1.91) | 69 (1.01) | 147 (.67) | 104 (1.06) | 88 (1.7) | 64 (1.24) |
| Normal weight | 7799 (39.62) | 7755 (40.46) | 6418 (42.84) | 3053 (28.67) | 6189 (45.92) | 8757 (38.72) | 2412 (35.27) | 5551 (25.36) | 2851 (29.16) | 1865 (35.93) | 1525 (29.46) |
| Overweight | 11627 (59.07) | 11015 (57.47) | 8272 (55.21) | 7549 (70.9) | 6987 (51.84) | 13428 (59.37) | 4358 (63.72) | 16194 (73.97) | 6822 (69.78) | 3237 (62.37) | 3587 (69.3) |
| Multimorbidity, n (%) |  |  |  |  |  |  |  |  |  |  |  |
| None | 3389 (19.83) | 3277 (18.68) | 3324 (24.82) | 2321 (23.92) | 3729 (30.9) | 4090 (20.49) | 1252 (22.73) | 3320 (17.19) | 886 (13.16) | 884 (21.67) | 653 (17.32) |
| Phy | 7353 (43.03) | 7988 (45.54) | 7676 (57.33) | 4420 (45.55) | 6102 (50.57) | 9702 (48.61) | 2538 (46.09) | 11110 (57.51) | 3028 (44.99) | 1962 (48.09) | 1717 (45.54) |
| Psy | 756 (4.42) | 1030 (5.87) | 397 (2.96) | 455 (4.69) | 506 (4.19) | 955 (4.78) | 197 (3.58) | 531 (2.75) | 262 (3.89) | 183 (4.49) | 135 (3.58) |
| Cog | 105 (.61) | 73 (.42) | 15 (.11) | 101 (1.04) | 25 (.21) | 68 (.34) | 21 (.38) | 29 (.15) | 37 (.55) | 21 (.51) | 15 (.4) |
| Phy + Psy | 4271 (24.99) | 4619 (26.33) | 1839 (13.73) | 1735 (17.88) | 1606 (13.31) | 4718 (23.64) | 1229 (22.32) | 3942 (20.41) | 2113 (31.39) | 931 (22.82) | 1081 (28.67) |
| Phy + Cog | 392 (2.29) | 237 (1.35) | 83 (.62) | 271 (2.79) | 53 (.44) | 199 (1) | 86 (1.56) | 172 (.89) | 140 (2.08) | 49 (1.2) | 43 (1.14) |
| Psy + Cog | 85 (.5) | 49 (.28) | 6 (.04) | 67 (.69) | 4 (.03) | 33 (.17) | 12 (.22) | 16 (.08) | 21 (.31) | 10 (.25) | 11 (.29) |
| Phy + Psy + Cog | 738 (4.32) | 268 (1.53) | 50 (.37) | 333 (3.43) | 42 (.35) | 195 (.98) | 172 (3.12) | 198 (1.02) | 244 (3.63) | 40 (.98) | 115 (3.05) |
| Outpatient, n (%) |  |  |  |  |  |  |  |  |  |  |  |
| No | 2234 (11.28) | 1127 (5.8) | 1954 (12.89) | 2037 (19.13) | 1769 (13.01) | 1374 (5.97) | 689 (9.91) | 1262 (5.66) | 1393 (13.74) | 194 (3.7) | 592 (11.37) |
| Yes | 17579 (88.72) | 18296 (94.2) | 13204 (87.11) | 8613 (80.87) | 11833 (86.99) | 21627 (94.03) | 6267 (90.09) | 21018 (94.34) | 8745 (86.26) | 5046 (96.3) | 4614 (88.63) |
| Inpatient, n (%) |  |  |  |  |  |  |  |  |  |  |  |
| No | 17609 (88.19) | 16594 (84.95) | 13306 (87.18) | 10000 (92.61) | 11496 (84.13) | 19153 (82.73) | 6337 (83.79) | 18316 (81.4) | 8304 (81.58) | 4344 (81.93) | 4370 (83.05) |
| Yes | 2358 (11.81) | 2940 (15.05) | 1957 (12.82) | 798 (7.39) | 2168 (15.87) | 3998 (17.27) | 1226 (16.21) | 4184 (18.6) | 1875 (18.42) | 958 (18.07) | 892 (16.95) |
| Outpatient visits, median (IQR) | 5 (2, 10) | 4 (3, 8) | 3 (1, 6) | 3 (1, 6) | 3 (1, 6) | 5 (3, 12) | 4 (2, 10) | 5 (3, 10) | 5 (2, 12) | 5 (3, 10) | 6 (2, 12) |
| Inpatient visits, median (IQR) | 0 (0, 0) | 0 (0, 0) | 0 (0, 0) | 0 (0, 0) | 0 (0, 0) | 0 (0, 0) | 0 (0, 0) | 0 (0, 0) | 0 (0, 0) | 0 (0, 0) | 0 (0, 0) |

Appendix Table 5: Basic demographics by country (Continued).

| Variable | Portugal | Slovenia | Estonia | Croatia | Lithuania | Bulgaria | Cyprus | Finland | Latvia | Romania | Slovakia |
| --- | --- | --- | --- | --- | --- | --- | --- | --- | --- | --- | --- |
| Gender, n (%) |  |  |  |  |  |  |  |  |  |  |  |
| Male | 5864 (44.83) | 14574 (44.49) | 19346 (41.5) | 7743 (44.65) | 4693 (37.2) | 5068 (42.11) | 3130 (41.22) | 5631 (46.08) | 3932 (37.08) | 5551 (43.16) | 5767 (46.15) |
| Female | 7216 (55.17) | 18182 (55.51) | 27275 (58.5) | 9597 (55.35) | 7923 (62.8) | 6966 (57.89) | 4464 (58.78) | 6590 (53.92) | 6673 (62.92) | 7310 (56.84) | 6729 (53.85) |
| Age, mean (SD) | 66.96 (9.35) | 67.71 (9.81) | 68.24 (10.13) | 66.18 (9.14) | 67.19 (10.5) | 67.11 (9.5) | 70.22 (10.44) | 66.88 (9.55) | 67.4 (10.19) | 66.11 (9.33) | 62.54 (8.13) |
| Education attainment, n (%) |  |  |  |  |  |  |  |  |  |  |  |
| Middle school or below | 10342 (79.07) | 11201 (34.2) | 13027 (27.94) | 9999 (57.66) | 2484 (19.69) | 3625 (30.12) | 4078 (53.7) | 3526 (28.85) | 1875 (17.68) | 6308 (49.05) | 1364 (10.92) |
| High school | 1213 (9.27) | 14994 (45.77) | 15497 (33.24) | 4465 (25.75) | 4693 (37.2) | 6142 (51.04) | 2159 (28.43) | 3488 (28.54) | 3690 (34.79) | 4871 (37.87) | 9756 (78.07) |
| College or above | 1525 (11.66) | 6561 (20.03) | 18097 (38.82) | 2876 (16.59) | 5439 (43.11) | 2267 (18.84) | 1357 (17.87) | 5207 (42.61) | 5040 (47.52) | 1682 (13.08) | 1376 (11.01) |
| Marital Status |  |  |  |  |  |  |  |  |  |  |  |
| Not married | 1226 (25.1) | 4801 (30.07) | 10959 (42.09) | 1524 (25.39) | 1516 (44.47) | 1025 (36.12) | 443 (25.49) | 984 (31.5) | 1142 (46.23) | 1003 (30.2) | 730 (24.46) |
| Married | 3658 (74.9) | 11166 (69.93) | 15075 (57.91) | 4479 (74.61) | 1893 (55.53) | 1813 (63.88) | 1295 (74.51) | 2140 (68.5) | 1328 (53.77) | 2318 (69.8) | 2254 (75.54) |
| Work status, n (%) |  |  |  |  |  |  |  |  |  |  |  |
| No | 3663 (76.36) | 13170 (83.21) | 16591 (64.26) | 4818 (80.74) | 2318 (68.32) | 2085 (73.83) | 1397 (81.51) | 2053 (66.1) | 1735 (70.53) | 2796 (84.42) | 1696 (56.97) |
| Yes | 1134 (23.64) | 2658 (16.79) | 9226 (35.74) | 1149 (19.26) | 1075 (31.68) | 739 (26.17) | 317 (18.49) | 1053 (33.9) | 725 (29.47) | 516 (15.58) | 1281 (43.03) |
| Household Wealth |  |  |  |  |  |  |  |  |  |  |  |
| Q1 | 901 (24.97) | 3080 (25.05) | 5275 (25.14) | 908 (25.01) | 355 (24.96) | 243 (27.06) | 135 (25.09) | 288 (24.85) | 197 (25.22) | 313 (24.72) | 250 (25.35) |
| Q2 | 905 (25.08) | 3066 (24.94) | 5268 (25.1) | 910 (25.07) | 358 (25.18) | 207 (23.05) | 134 (24.91) | 291 (25.11) | 195 (24.97) | 327 (25.83) | 245 (24.85) |
| Q3 | 903 (25.02) | 3079 (25.04) | 5232 (24.93) | 903 (24.88) | 356 (25.04) | 226 (25.17) | 136 (25.28) | 290 (25.02) | 197 (25.22) | 309 (24.41) | 247 (25.05) |
| Q4 | 900 (24.94) | 3070 (24.97) | 5209 (24.82) | 909 (25.04) | 353 (24.82) | 222 (24.72) | 133 (24.72) | 290 (25.02) | 192 (24.58) | 317 (25.04) | 244 (24.75) |
| Alcohol use, n (%) |  |  |  |  |  |  |  |  |  |  |  |
| No | 1857 (51.84) | 7055 (57.57) | 16068 (76.89) | 2296 (63.48) | 1023 (71.99) | 602 (67.04) | 349 (65.23) | 599 (51.86) | 577 (74.07) | 891 (70.49) | 578 (58.68) |
| Yes | 1725 (48.16) | 5200 (42.43) | 4830 (23.11) | 1321 (36.52) | 398 (28.01) | 296 (32.96) | 186 (34.77) | 556 (48.14) | 202 (25.93) | 373 (29.51) | 407 (41.32) |
| Tobacco use, n (%) |  |  |  |  |  |  |  |  |  |  |  |
| No | 1890 (89.74) | 8320 (86.38) | 13014 (81.12) | 2819 (77.96) | 1202 (84.59) | 740 (82.77) | 466 (87.1) | 1040 (89.97) | 665 (85.15) | 1074 (84.97) | 814 (82.64) |
| Yes | 216 (10.26) | 1312 (13.62) | 3029 (18.88) | 797 (22.04) | 219 (15.41) | 154 (17.23) | 69 (12.9) | 116 (10.03) | 116 (14.85) | 190 (15.03) | 171 (17.36) |
| Physical exercise, n (%) |  |  |  |  |  |  |  |  |  |  |  |
| No | 907 (25.32) | 1424 (11.62) | 2994 (14.32) | 382 (10.56) | 264 (18.58) | 192 (21.4) | 226 (42.16) | 64 (5.55) | 111 (14.23) | 206 (16.3) | 91 (9.24) |
| Yes | 2675 (74.68) | 10829 (88.38) | 17919 (85.68) | 3235 (89.44) | 1157 (81.42) | 705 (78.6) | 310 (57.84) | 1090 (94.45) | 669 (85.77) | 1058 (83.7) | 894 (90.76) |
| BMI, n (%) |  |  |  |  |  |  |  |  |  |  |  |
| Underweight | 51 (1.1) | 122 (.79) | 279 (1.1) | 39 (.67) | 26 (.77) | 35 (1.29) | 12 (.78) | 21 (.68) | 20 (.83) | 43 (1.33) | 22 (.75) |
| Normal weight | 1500 (32.43) | 4516 (29.14) | 7636 (30.15) | 1626 (27.74) | 920 (27.38) | 836 (30.77) | 492 (32.14) | 1030 (33.54) | 617 (25.62) | 897 (27.8) | 858 (29.26) |
| Overweight | 3074 (66.46) | 10860 (70.07) | 17414 (68.75) | 4196 (71.59) | 2414 (71.85) | 1846 (67.94) | 1027 (67.08) | 2020 (65.78) | 1771 (73.55) | 2287 (70.87) | 2052 (69.99) |
| Multimorbidity, n (%) |  |  |  |  |  |  |  |  |  |  |  |
| None | 661 (18.32) | 3060 (24.89) | 3539 (16.87) | 877 (24.16) | 255 (17.93) | 155 (17.26) | 91 (16.91) | 223 (19.24) | 140 (17.93) | 246 (19.43) | 411 (41.68) |
| Phy | 1269 (35.16) | 6006 (48.85) | 9440 (44.99) | 1591 (43.83) | 589 (41.42) | 0 (0) | 282 (52.42) | 616 (53.15) | 367 (46.99) | 492 (38.86) | 334 (33.87) |
| Psy | 232 (6.43) | 596 (4.85) | 980 (4.67) | 176 (4.85) | 55 (3.87) | 482 (53.67) | 8 (1.49) | 58 (5) | 25 (3.2) | 60 (4.74) | 52 (5.27) |
| Cog | 53 (1.47) | 44 (.36) | 51 (.24) | 24 (.66) | 6 (.42) | 19 (2.12) | 8 (1.49) | 1 (.09) | 5 (.64) | 20 (1.58) | 3 (.3) |
| Phy + Psy | 1039 (28.79) | 2326 (18.92) | 6398 (30.49) | 843 (23.22) | 463 (32.56) | 192 (21.38) | 86 (15.99) | 250 (21.57) | 212 (27.14) | 335 (26.46) | 160 (16.23) |
| Phy + Cog | 105 (2.91) | 102 (.83) | 174 (.83) | 36 (.99) | 17 (1.2) | 17 (1.89) | 34 (6.32) | 6 (.52) | 12 (1.54) | 26 (2.05) | 4 (.41) |
| Psy + Cog | 29 (.8) | 20 (.16) | 45 (.21) | 11 (.3) | 6 (.42) | 5 (.56) | 2 (.37) | 1 (.09) | 1 (.13) | 15 (1.18) | 1 (.1) |
| Phy + Psy + Cog | 221 (6.12) | 141 (1.15) | 357 (1.7) | 72 (1.98) | 31 (2.18) | 28 (3.12) | 27 (5.02) | 4 (.35) | 19 (2.43) | 72 (5.69) | 21 (2.13) |
| Outpatient, n (%) |  |  |  |  |  |  |  |  |  |  |  |
| No | 397 (8.42) | 1967 (12.47) | 3722 (14.54) | 965 (16.22) | 482 (14.23) | 524 (18.71) | 359 (20.92) | 485 (15.6) | 414 (16.9) | 946 (28.61) | 408 (13.9) |
| Yes | 4317 (91.58) | 13802 (87.53) | 21885 (85.46) | 4984 (83.78) | 2906 (85.77) | 2277 (81.29) | 1357 (79.08) | 2623 (84.4) | 2035 (83.1) | 2360 (71.39) | 2527 (86.1) |
| Inpatient, n (%) |  |  |  |  |  |  |  |  |  |  |  |
| No | 4264 (88.06) | 13528 (85.11) | 22039 (85.05) | 5194 (86.73) | 2757 (81.14) | 2448 (86.53) | 1526 (88.67) | 2719 (87.01) | 2133 (86.43) | 2764 (83.4) | 2731 (91.64) |
| Yes | 578 (11.94) | 2367 (14.89) | 3873 (14.95) | 795 (13.27) | 641 (18.86) | 381 (13.47) | 195 (11.33) | 406 (12.99) | 335 (13.57) | 550 (16.6) | 249 (8.36) |
| Outpatient visits, median (IQR) | 3 (2, 6) | 4 (2, 6) | 4 (1, 7) | 5 (1, 12) | 4 (1, 6) | 4 (1, 10) | 3 (1, 6) | 2 (1, 5) | 4 (1, 6) | 3 (0, 7) | 3 (1, 7) |
| Inpatient visits, median (IQR) | 0 (0, 0) | 0 (0, 0) | 0 (0, 0) | 0 (0, 0) | 0 (0, 0) | 0 (0, 0) | 0 (0, 0) | 0 (0, 0) | 0 (0, 0) | 0 (0, 0) | 0 (0, 0) |
| *Note:* Cog: cognitive disorder; Psy: psychological disorder; Phy: physical condition; Psy + Cog: psychological-cognitive multimorbidity; Phy + Cog: physical-cognitive multimorbidity; Phy + Psy: physical- psychological multimorbidity; Phy + Psy + Cog: physical-psychological-cognitive multimorbidity. | | | | | | | | | | | |

Appendix Table 6. The association between multimorbidity and outpatient by country.

| Multimorbidity | United States | | China | | Japan | | South Korea | | Mexico | | Austria | |
| --- | --- | --- | --- | --- | --- | --- | --- | --- | --- | --- | --- | --- |
| Odds ratio (95% CI) | P | Odds ratio (95% CI) | P | Odds ratio (95% CI) | P | Odds ratio (95% CI) | P | Odds ratio (95% CI) | P | Odds ratio (95% CI) | P |
| None (Ref) |  |  |  |  |  |  |  |  |  |  |  |  |
| Phy | 5.91 (5.17 to 6.75) | <0.001 | 1.90 (1.53 to 2.36) | <0.001 | 6.97 (4.49 to 10.82) | <0.001 | 3.55 (3.09 to 4.08) | <0.001 | 3.87 (3.13 to 4.77) | <0.001 | 3.03 (2.47 to 3.71) | <0.001 |
| Psy | 0.92 (0.68 to 1.23) | 0.560 | 1.99 (1.67 to 2.36) | <0.001 | 1.60 (1.16 to 2.21) | 0.004 | 0.98 (0.88 to 1.08) | 0.654 | 1.36 (1.03 to 1.81) | 0.033 | 1.99 (1.33 to 2.99) | 0.001 |
| Cog | 0.46 (0.10 to 2.12) | 0.320 | 0.93 (0.73 to 1.18) | 0.541 | 0.51 (0.25 to 1.04) | 0.064 | 0.95 (0.76 to 1.18) | 0.641 | 0.64 (0.47 to 0.86) | 0.003 | 0.47 (0.16 to 1.44) | 0.188 |
| Phy + Psy | 7.49 (6.19 to 9.07) | <0.001 | 4.05 (3.21 to 5.10) | <0.001 | 8.27 (4.64 to 14.74) | <0.001 | 2.37 (2.12 to 2.65) | <0.001 | 3.77 (2.97 to 4.78) | <0.001 | 5.44 (3.92 to 7.55) | <0.001 |
| Phy + Cog | 2.24 (1.49 to 3.37) | <0.001 | 1.94 (1.31 to 2.89) | 0.001 | 13.89 (3.92 to 49.23) | <0.001 | 3.38 (2.68 to 4.27) | <0.001 | 2.74 (2.04 to 3.68) | <0.001 | 2.34 (0.81 to 6.75) | 0.115 |
| Psy + Cog | 0.18 (0.02 to 1.57) | 0.122 | 2.17 (1.71 to 2.75) | <0.001 | 2.82 (0.41 to 19.22) | 0.291 | 1.08 (0.93 to 1.25) | 0.329 | 0.87 (0.53 to 1.43) | 0.578 | 0.84 (0.17 to 4.12) | 0.826 |
| Phy + Psy + Cog | 3.25 (1.74 to 6.09) | <0.001 | 2.75 (1.93 to 3.92) | <0.001 | 26.37 (2.70 to 257.34) | 0.005 | 2.76 (2.41 to 3.15) | <0.001 | 3.57 (2.64 to 4.81) | <0.001 | 1.82 (0.72 to 4.60) | 0.206 |

Appendix Table 6. The association between multimorbidity and outpatient by country (continued).

| Multimorbidity | Germany | | Sweden | | Netherlands | | Spain | | Italy | | France | |
| --- | --- | --- | --- | --- | --- | --- | --- | --- | --- | --- | --- | --- |
| Odds ratio (95% CI) | P | Odds ratio (95% CI) | P | Odds ratio (95% CI) | P | Odds ratio (95% CI) | P | Odds ratio (95% CI) | P | Odds ratio (95% CI) | P |
| None (Ref) |  |  |  |  |  |  |  |  |  |  |  |  |
| Phy | 7.42 (5.36 to 10.28) | <0.001 | 5.16 (4.28 to 6.21) | <0.001 | 5.63 (4.58 to 6.93) | <0.001 | 4.69 (3.81 to 5.78) | <0.001 | 3.70 (3.05 to 4.49) | <0.001 | 9.27 (6.90 to 12.46) | <0.001 |
| Psy | 2.53 (1.48 to 4.31) | 0.001 | 2.21 (1.59 to 3.09) | <0.001 | 2.25 (1.58 to 3.19) | <0.001 | 1.89 (1.32 to 2.70) | <0.001 | 1.70 (1.28 to 2.26) | <0.001 | 1.77 (1.24 to 2.53) | 0.002 |
| Cog | 0.34 (0.07 to 1.69) | 0.186 | 0.39 (0.13 to 1.16) | 0.091 | 2.47 (0.66 to 9.19) | 0.178 | 0.59 (0.36 to 0.97) | 0.039 | 0.73 (0.38 to 1.38) | 0.331 | 0.77 (0.27 to 2.14) | 0.611 |
| Phy + Psy | 11.22 (7.22 to 17.44) | <0.001 | 7.31 (5.51 to 9.69) | <0.001 | 11.37 (7.91 to 16.34) | <0.001 | 9.83 (7.12 to 13.57) | <0.001 | 6.11 (4.75 to 7.86) | <0.001 | 13.66 (9.21 to 20.26) | <0.001 |
| Phy + Cog | 2.79 (0.88 to 8.82) | 0.081 | 5.64 (1.71 to 18.63) | 0.005 | 11.56 (3.09 to 43.23) | <0.001 | 4.09 (2.39 to 6.99) | <0.001 | 3.07 (1.84 to 5.12) | <0.001 | 4.39 (1.63 to 11.78) | 0.003 |
| Psy + Cog | 0.14 (0.02 to 0.99) | 0.049 |  |  | 1.84 (0.25 to 13.69) | 0.553 | 1.69 (0.70 to 4.08) | 0.239 | 1.98 (0.81 to 4.84) | 0.137 | 0.62 (0.19 to 2.05) | 0.438 |
| Phy + Psy + Cog | 8.24 (1.45 to 46.90) | 0.017 | 5.62 (1.48 to 21.39) | 0.011 | 21.43 (2.33 to 196.93) | 0.007 | 9.82 (5.20 to 18.54) | <0.001 | 4.30 (2.75 to 6.71) | <0.001 | 9.55 (2.32 to 39.43) | 0.002 |

Appendix Table 6. The association between multimorbidity and outpatient by country (continued).

| Multimorbidity | Denmark | | Greece | | Switzerland | | Belgium | | Israel | | Czech Republic | |
| --- | --- | --- | --- | --- | --- | --- | --- | --- | --- | --- | --- | --- |
| Odds ratio (95% CI) | P | Odds ratio (95% CI) | P | Odds ratio (95% CI) | P | Odds ratio (95% CI) | P | Odds ratio (95% CI) | P | Odds ratio (95% CI) | P |
| None (Ref) |  |  |  |  |  |  |  |  |  |  |  |  |
| Phy | 5.51 (4.48 to 6.76) | <0.001 | 6.59 (5.05 to 8.60) | <0.001 | 4.90 (3.97 to 6.06) | <0.001 | 6.55 (5.01 to 8.55) | <0.001 | 4.23 (2.72 to 6.57) | <0.001 | 7.49 (5.86 to 9.57) | <0.001 |
| Psy | 2.89 (1.87 to 4.47) | <0.001 | 1.27 (0.90 to 1.79) | 0.178 | 2.16 (1.48 to 3.14) | <0.001 | 2.08 (1.43 to 3.01) | <0.001 | 6.58 (2.13 to 20.25) | 0.001 | 1.18 (0.80 to 1.73) | 0.407 |
| Cog | 0.83 (0.06 to 10.88) | 0.890 | 1.08 (0.55 to 2.11) | 0.830 | 0.59 (0.18 to 1.90) | 0.376 | 1.91 (0.51 to 7.15) | 0.338 | 0.28 (0.05 to 1.57) | 0.148 | 1.12 (0.28 to 4.43) | 0.870 |
| Phy + Psy | 11.16 (7.68 to 16.22) | <0.001 | 5.65 (4.06 to 7.87) | <0.001 | 10.51 (7.20 to 15.34) | <0.001 | 10.44 (7.23 to 15.09) | <0.001 | 6.19 (3.38 to 11.36) | <0.001 | 6.86 (4.99 to 9.42) | <0.001 |
| Phy + Cog | 4.73 (1.20 to 18.68) | 0.027 | 3.53 (1.93 to 6.47) | <0.001 | 17.90 (2.28 to 140.65) | 0.006 | 2.84 (0.96 to 8.41) | 0.059 | 1.64 (0.50 to 5.44) | 0.417 | 5.39 (1.70 to 17.07) | 0.004 |
| Psy + Cog |  |  | 4.69 (1.12 to 19.61) | 0.034 |  |  | 1.38 (0.25 to 7.71) | 0.712 | 0.34 (0.03 to 4.41) | 0.409 | 0.38 (0.08 to 1.77) | 0.216 |
| Phy + Psy + Cog | 3.03 (0.52 to 17.72) | 0.219 | 8.11 (3.77 to 17.44) | <0.001 | 17.61 (2.16 to 143.74) | 0.007 | 6.55 (1.56 to 27.54) | 0.010 | 4.57 (1.16 to 17.92) | 0.029 | 10.42 (2.94 to 36.91) | <0.001 |

Appendix Table 6. The association between multimorbidity and outpatient by country (continued).

| Multimorbidity | Poland | | Luxembourg | | Hungary | | Portugal | | Slovenia | | Estonia | |
| --- | --- | --- | --- | --- | --- | --- | --- | --- | --- | --- | --- | --- |
| Odds ratio (95% CI) | P | Odds ratio (95% CI) | P | Odds ratio (95% CI) | P | Odds ratio (95% CI) | P | Odds ratio (95% CI) | P | Odds ratio (95% CI) | P |
| None (Ref) |  |  |  |  |  |  |  |  |  |  |  |  |
| Phy | 11.83 (7.75 to 18.07) | <0.001 | 5.29 (2.78 to 10.09) | <0.001 | 11.23 (6.31 to 19.98) | <0.001 | 2.60 (1.76 to 3.84) | <0.001 | 6.41 (5.16 to 7.98) | <0.001 | 6.10 (5.10 to 7.30) | <0.001 |
| Psy | 1.41 (0.85 to 2.37) | 0.185 | 1.99 (0.78 to 5.10) | 0.152 | 2.49 (1.25 to 4.98) | 0.010 | 1.36 (0.79 to 2.34) | 0.273 | 1.59 (1.16 to 2.18) | 0.004 | 1.41 (1.11 to 1.79) | 0.005 |
| Cog | 0.49 (0.12 to 1.96) | 0.317 | 0.65 (0.08 to 5.33) | 0.688 | 0.43 (0.08 to 2.30) | 0.324 | 2.66 (0.93 to 7.64) | 0.069 | 0.30 (0.11 to 0.84) | 0.022 | 0.24 (0.10 to 0.59) | 0.002 |
| Phy + Psy | 14.37 (9.08 to 22.73) | <0.001 | 14.78 (5.49 to 39.78) | <0.001 | 17.82 (8.81 to 36.03) | <0.001 | 5.56 (3.24 to 9.55) | <0.001 | 8.32 (6.12 to 11.31) | <0.001 | 9.75 (7.93 to 11.99) | <0.001 |
| Phy + Cog | 11.41 (4.12 to 31.55) | <0.001 | 2.29 (0.42 to 12.48) | 0.338 | 16.08 (3.30 to 78.32) | 0.001 | 1.57 (0.68 to 3.62) | 0.286 | 6.19 (2.22 to 17.27) | <0.001 | 2.70 (1.45 to 5.02) | 0.002 |
| Psy + Cog | 5.25 (0.90 to 30.63) | 0.065 |  |  | 15.88 (0.73 to 346.11) | 0.079 | 4.86 (0.60 to 39.63) | 0.140 | 1.84 (0.45 to 7.51) | 0.396 | 1.43 (0.54 to 3.76) | 0.472 |
| Phy + Psy + Cog | 7.61 (3.57 to 16.22) | <0.001 | 5.12 (0.52 to 50.34) | 0.162 | 19.36 (5.75 to 65.19) | <0.001 | 3.61 (1.47 to 8.87) | 0.005 | 2.31 (1.10 to 4.82) | 0.026 | 7.67 (4.39 to 13.41) | <0.001 |

Appendix Table 6. The association between multimorbidity and outpatient by country (continued).

| Multimorbidity | Croatia | | Lithuania | | Bulgaria | | Cyprus | | Finland | | Latvia | |
| --- | --- | --- | --- | --- | --- | --- | --- | --- | --- | --- | --- | --- |
| Odds ratio (95% CI) | P | Odds ratio (95% CI) | P | Odds ratio (95% CI) | P | Odds ratio (95% CI) | P | Odds ratio (95% CI) | P | Odds ratio (95% CI) | P |
| None (Ref) |  |  |  |  |  |  |  |  |  |  |  |  |
| Phy | 6.30 (4.49 to 8.85) | <0.001 | 4.54 (0.03 to 660.43) | 0.552 | 6.42 (3.69 to 11.17) | <0.001 | 1.30 (0.34 to 4.96) | 0.702 | 3.07 (1.54 to 6.10) | 0.001 | 10.40 (3.93 to 27.57) | <0.001 |
| Psy | 1.81 (1.14 to 2.86) | 0.011 | 1.95 (0.09 to 40.91) | 0.666 | 4.08 (1.05 to 15.84) | 0.042 | 1.24 (0.03 to 53.60) | 0.911 | 1.24 (0.37 to 4.12) | 0.728 | 0.42 (0.06 to 2.92) | 0.380 |
| Cog | 0.88 (0.28 to 2.79) | 0.834 | 0.10 (0.00 to 75227.25) | 0.735 | 14.88 (5.35 to 41.36) | <0.001 | 0.03 (0.00 to 19.82) | 0.280 |  |  | 0.12 (0.00 to 4.60) | 0.254 |
| Phy + Psy | 9.38 (5.95 to 14.78) | <0.001 | 6.44 (0.03 to 1631.44) | 0.510 |  |  | 7.34 (0.21 to 256.97) | 0.272 | 9.35 (3.69 to 23.73) | <0.001 | 14.74 (4.11 to 52.85) | <0.001 |
| Phy + Cog | 2.28 (0.77 to 6.76) | 0.136 | 1.29 (0.15 to 11.46) | 0.819 | 2.35 (0.35 to 15.53) | 0.376 | 3.32 (0.14 to 76.93) | 0.454 | 3.15 (0.15 to 67.97) | 0.464 | 1.53 (0.11 to 21.19) | 0.752 |
| Psy + Cog | 1.19 (0.17 to 8.24) | 0.862 |  |  | 8.04 (1.57 to 41.25) | 0.012 |  |  |  |  |  |  |
| Phy + Psy + Cog | 6.55 (2.27 to 18.95) | 0.001 | 11.07 (0.01 to 13684.47) | 0.508 | 1.01 (0.98 to 1.05) | 0.460 | 0.16 (0.00 to 6.18) | 0.324 | 1.02 (0.97 to 1.06) | 0.475 | 40.44 (2.57 to 637.23) | 0.009 |

Appendix Table 6. The association between multimorbidity and outpatient by country (continued).

| Multimorbidity | Romania | | Slovakia | |
| --- | --- | --- | --- | --- |
| Odds ratio (95% CI) | P | Odds ratio (95% CI) | P |
| None (Ref) |  |  |  |  |
| Phy | 6.35 (4.30 to 9.38) | <0.001 | 3.85 (1.80 to 8.24) | 0.001 |
| Psy | 1.30 (0.72 to 2.33) | 0.381 | 2.25 (0.85 to 5.99) | 0.103 |
| Cog | 2.85 (1.05 to 7.77) | 0.040 |  |  |
| Phy + Psy | 11.23 (6.77 to 18.63) | <0.001 | 5.57 (1.71 to 18.10) | 0.004 |
| Phy + Cog | 5.12 (1.51 to 17.33) | 0.009 | 0.17 (0.01 to 2.99) | 0.228 |
| Psy + Cog | 0.41 (0.12 to 1.42) | 0.161 |  |  |
| Phy + Psy + Cog | 2.87 (1.45 to 5.68) | 0.002 | 3.65 (0.56 to 23.67) | 0.174 |
| *Note:* Cog: cognitive disorder; Psy: psychological disorder; Phy: physical condition; Psy + Cog: psychological-cognitive multimorbidity; Phy + Cog: physical-cognitive multimorbidity; Phy + Psy: physical- psychological multimorbidity; Phy + Psy + Cog: physical-psychological-cognitive multimorbidity. These are estimated by random effect logit model. | | | | |

Appendix Table 7. The association between multimorbidity and outpatient visits by country (continued).

| Multimorbidity | United States | | China | | Japan | | South Korea | | Austria | | Germany | |
| --- | --- | --- | --- | --- | --- | --- | --- | --- | --- | --- | --- | --- |
| Odds ratio (95% CI) | P | Odds ratio (95% CI) | P | Odds ratio (95% CI) | P | Odds ratio (95% CI) | P | Odds ratio (95% CI) | P | Odds ratio (95% CI) | P |
| None (Ref) |  |  |  |  |  |  |  |  |  |  |  |  |
| Phy | 1.89 (1.82 to 1.95) | <0.001 | 1.66 (1.41 to 1.95) | <0.001 | 3.38 (3.09 to 3.70) | <0.001 | 2.21 (2.12 to 2.31) | <0.001 | 1.57 (1.49 to 1.64) | <0.001 | 1.71 (1.62 to 1.80) | <0.001 |
| Psy | 1.13 (1.02 to 1.25) | 0.018 | 1.79 (1.56 to 2.04) | <0.001 | 1.47 (1.22 to 1.76) | <0.001 | 1.00 (0.96 to 1.04) | 0.931 | 1.42 (1.29 to 1.56) | <0.001 | 1.35 (1.23 to 1.48) | <0.001 |
| Cog | 0.89 (0.55 to 1.44) | 0.641 | 0.91 (0.74 to 1.11) | 0.354 | 0.92 (0.56 to 1.50) | 0.730 | 1.06 (0.97 to 1.17) | 0.203 | 0.69 (0.47 to 1.02) | 0.065 | 0.62 (0.38 to 1.02) | 0.061 |
| Phy + Psy | 2.20 (2.11 to 2.29) | <0.001 | 3.15 (2.70 to 3.67) | <0.001 | 3.75 (3.28 to 4.29) | <0.001 | 1.90 (1.82 to 1.98) | <0.001 | 2.02 (1.90 to 2.14) | <0.001 | 2.18 (2.05 to 2.31) | <0.001 |
| Phy + Cog | 1.47 (1.31 to 1.65) | <0.001 | 1.60 (1.17 to 2.19) | 0.003 | 4.39 (3.26 to 5.92) | <0.001 | 2.04 (1.92 to 2.17) | <0.001 | 1.67 (1.36 to 2.06) | <0.001 | 1.95 (1.63 to 2.33) | <0.001 |
| Psy + Cog | 0.41 (0.10 to 1.62) | 0.201 | 1.92 (1.60 to 2.29) | <0.001 | 1.80 (0.58 to 5.54) | 0.307 | 1.10 (1.04 to 1.17) | 0.001 | 1.10 (0.71 to 1.71) | 0.657 | 0.63 (0.32 to 1.26) | 0.191 |
| Phy + Psy + Cog | 1.50 (1.27 to 1.77) | <0.001 | 2.32 (1.79 to 3.00) | <0.001 | 4.20 (2.68 to 6.59) | <0.001 | 1.97 (1.88 to 2.06) | <0.001 | 1.67 (1.37 to 2.03) | <0.001 | 2.45 (2.04 to 2.92) | <0.001 |

Appendix Table 7. The association between multimorbidity and outpatient visits by country (continued).

| Multimorbidity | Sweden | | Netherlands | | Spain | | Italy | | France | | Denmark | |
| --- | --- | --- | --- | --- | --- | --- | --- | --- | --- | --- | --- | --- |
| Odds ratio (95% CI) | P | Odds ratio (95% CI) | P | Odds ratio (95% CI) | P | Odds ratio (95% CI) | P | Odds ratio (95% CI) | P | Odds ratio (95% CI) | P |
| None (Ref) |  |  |  |  |  |  |  |  |  |  |  |  |
| Phy | 1.85 (1.74 to 1.96) | <0.001 | 1.97 (1.86 to 2.09) | <0.001 | 1.85 (1.76 to 1.95) | <0.001 | 1.77 (1.68 to 1.86) | <0.001 | 1.83 (1.75 to 1.91) | <0.001 | 1.95 (1.84 to 2.07) | <0.001 |
| Psy | 1.53 (1.36 to 1.72) | <0.001 | 1.49 (1.33 to 1.66) | <0.001 | 1.43 (1.30 to 1.57) | <0.001 | 1.30 (1.19 to 1.42) | <0.001 | 1.38 (1.29 to 1.48) | <0.001 | 1.67 (1.47 to 1.89) | <0.001 |
| Cog | 0.63 (0.34 to 1.17) | 0.142 | 1.38 (0.90 to 2.11) | 0.142 | 0.91 (0.75 to 1.11) | 0.344 | 0.84 (0.66 to 1.06) | 0.147 | 1.18 (0.94 to 1.47) | 0.152 | 0.70 (0.30 to 1.62) | 0.404 |
| Phy + Psy | 2.50 (2.32 to 2.70) | <0.001 | 2.77 (2.58 to 2.98) | <0.001 | 2.40 (2.27 to 2.54) | <0.001 | 2.23 (2.11 to 2.36) | <0.001 | 2.21 (2.10 to 2.32) | <0.001 | 2.71 (2.52 to 2.92) | <0.001 |
| Phy + Cog | 1.69 (1.28 to 2.22) | <0.001 | 2.34 (1.87 to 2.94) | <0.001 | 1.76 (1.60 to 1.94) | <0.001 | 1.74 (1.56 to 1.94) | <0.001 | 1.84 (1.62 to 2.08) | <0.001 | 2.35 (1.79 to 3.08) | <0.001 |
| Psy + Cog | 1.42 (0.37 to 5.45) | 0.605 | 1.92 (0.99 to 3.72) | 0.052 | 1.60 (1.30 to 1.97) | <0.001 | 1.53 (1.23 to 1.90) | <0.001 | 1.58 (1.23 to 2.03) | <0.001 | 2.33 (1.07 to 5.05) | 0.032 |
| Phy + Psy + Cog | 2.23 (1.67 to 2.96) | <0.001 | 2.82 (2.17 to 3.67) | <0.001 | 2.33 (2.14 to 2.52) | <0.001 | 2.24 (2.06 to 2.44) | <0.001 | 2.34 (2.10 to 2.60) | <0.001 | 3.19 (2.25 to 4.51) | <0.001 |

Appendix Table 7. The association between multimorbidity and outpatient visits by country (continued).

| Multimorbidity | Greece | | Switzerland | | Belgium | | Israel | | Czech Republic | | Poland | |
| --- | --- | --- | --- | --- | --- | --- | --- | --- | --- | --- | --- | --- |
| Odds ratio (95% CI) | P | Odds ratio (95% CI) | P | Odds ratio (95% CI) | P | Odds ratio (95% CI) | P | Odds ratio (95% CI) | P | Odds ratio (95% CI) | P |
| None (Ref) |  |  |  |  |  |  |  |  |  |  |  |  |
| Phy | 2.21 (2.06 to 2.37) | <0.001 | 1.81 (1.71 to 1.91) | <0.001 | 1.77 (1.69 to 1.85) | <0.001 | 1.82 (1.65 to 2.00) | <0.001 | 1.97 (1.88 to 2.06) | <0.001 | 2.85 (2.58 to 3.14) | <0.001 |
| Psy | 1.17 (1.03 to 1.33) | 0.015 | 1.43 (1.28 to 1.60) | <0.001 | 1.45 (1.35 to 1.56) | <0.001 | 1.68 (1.40 to 2.03) | <0.001 | 1.39 (1.27 to 1.53) | <0.001 | 1.32 (1.11 to 1.58) | 0.002 |
| Cog | 1.16 (0.89 to 1.51) | 0.266 | 0.83 (0.48 to 1.45) | 0.511 | 1.12 (0.85 to 1.47) | 0.417 | 0.59 (0.25 to 1.38) | 0.220 | 1.17 (0.79 to 1.75) | 0.435 | 0.52 (0.26 to 1.03) | 0.062 |
| Phy + Psy | 2.32 (2.14 to 2.52) | <0.001 | 2.41 (2.24 to 2.58) | <0.001 | 2.16 (2.06 to 2.27) | <0.001 | 2.44 (2.17 to 2.74) | <0.001 | 2.36 (2.24 to 2.49) | <0.001 | 3.39 (3.06 to 3.76) | <0.001 |
| Phy + Cog | 1.86 (1.60 to 2.15) | <0.001 | 2.72 (2.00 to 3.69) | <0.001 | 1.92 (1.66 to 2.21) | <0.001 | 1.37 (1.01 to 1.84) | 0.040 | 2.01 (1.74 to 2.32) | <0.001 | 2.69 (2.23 to 3.24) | <0.001 |
| Psy + Cog | 1.50 (1.08 to 2.08) | 0.017 | 4.33 (2.07 to 9.07) | <0.001 | 1.61 (1.12 to 2.33) | 0.011 | 1.25 (0.47 to 3.30) | 0.657 | 0.85 (0.50 to 1.43) | 0.535 | 1.77 (1.09 to 2.85) | 0.020 |
| Phy + Psy + Cog | 2.28 (2.00 to 2.61) | <0.001 | 3.13 (2.37 to 4.13) | <0.001 | 2.44 (2.13 to 2.80) | <0.001 | 2.13 (1.67 to 2.71) | <0.001 | 2.32 (2.03 to 2.65) | <0.001 | 2.69 (2.29 to 3.17) | <0.001 |

Appendix Table 7. The association between multimorbidity and outpatient visits by country (continued).

| Multimorbidity | Luxembourg | | Hungary | | Portugal | | Slovenia | | Estonia | | Croatia | |
| --- | --- | --- | --- | --- | --- | --- | --- | --- | --- | --- | --- | --- |
| Odds ratio (95% CI) | P | Odds ratio (95% CI) | P | Odds ratio (95% CI) | P | Odds ratio (95% CI) | P | Odds ratio (95% CI) | P | Odds ratio (95% CI) | P |
| None (Ref) |  |  |  |  |  |  |  |  |  |  |  |  |
| Phy | 1.64 (1.50 to 1.80) | <0.001 | 2.50 (2.26 to 2.77) | <0.001 | 1.59 (1.40 to 1.81) | <0.001 | 1.96 (1.85 to 2.07) | <0.001 | 2.18 (2.07 to 2.30) | <0.001 | 2.45 (2.22 to 2.69) | <0.001 |
| Psy | 1.37 (1.16 to 1.61) | <0.001 | 1.52 (1.25 to 1.85) | <0.001 | 1.50 (1.23 to 1.82) | <0.001 | 1.41 (1.27 to 1.56) | <0.001 | 1.30 (1.19 to 1.42) | <0.001 | 1.56 (1.31 to 1.86) | <0.001 |
| Cog | 0.88 (0.52 to 1.47) | 0.615 | 0.49 (0.22 to 1.08) | 0.077 | 1.24 (0.89 to 1.74) | 0.201 | 0.56 (0.34 to 0.90) | 0.017 | 0.50 (0.28 to 0.89) | 0.019 | 1.00 (0.60 to 1.66) | 1.000 |
| Phy + Psy | 2.05 (1.85 to 2.28) | <0.001 | 3.22 (2.89 to 3.58) | <0.001 | 2.29 (2.00 to 2.63) | <0.001 | 2.28 (2.13 to 2.44) | <0.001 | 2.72 (2.57 to 2.88) | <0.001 | 3.16 (2.84 to 3.52) | <0.001 |
| Phy + Cog | 1.62 (1.20 to 2.19) | 0.002 | 2.75 (2.09 to 3.61) | <0.001 | 1.67 (1.26 to 2.20) | <0.001 | 2.10 (1.71 to 2.57) | <0.001 | 1.92 (1.59 to 2.31) | <0.001 | 2.21 (1.57 to 3.13) | <0.001 |
| Psy + Cog | 1.78 (0.95 to 3.31) | 0.071 | 2.68 (1.56 to 4.60) | <0.001 | 1.85 (1.22 to 2.81) | 0.004 | 1.35 (0.82 to 2.21) | 0.240 | 1.20 (0.73 to 1.95) | 0.474 | 1.56 (0.70 to 3.49) | 0.280 |
| Phy + Psy + Cog | 1.67 (1.23 to 2.26) | 0.001 | 3.33 (2.80 to 3.95) | <0.001 | 2.17 (1.77 to 2.66) | <0.001 | 1.90 (1.57 to 2.31) | <0.001 | 2.58 (2.29 to 2.92) | <0.001 | 2.29 (1.79 to 2.91) | <0.001 |

Appendix Table 7. The association between multimorbidity and outpatient visits by country (continued).

| Multimorbidity | Lithuania | | Bulgaria | | Cyprus | | Finland | | Latvia | | Romania | |
| --- | --- | --- | --- | --- | --- | --- | --- | --- | --- | --- | --- | --- |
| Odds ratio (95% CI) | P | Odds ratio (95% CI) | P | Odds ratio (95% CI) | P | Odds ratio (95% CI) | P | Odds ratio (95% CI) | P | Odds ratio (95% CI) | P |
| None (Ref) |  |  |  |  |  |  |  |  |  |  |  |  |
| Phy | 2.39 (2.05 to 2.80) | <0.001 | 2.49 (2.01 to 3.08) | <0.001 | 1.56 (1.20 to 2.03) | 0.001 | 1.58 (1.33 to 1.89) | <0.001 | 2.02 (1.66 to 2.47) | <0.001 | 3.25 (2.66 to 3.97) | <0.001 |
| Psy | 1.55 (1.17 to 2.07) | 0.002 | 1.66 (1.02 to 2.71) | 0.042 | 1.13 (0.53 to 2.41) | 0.752 | 1.22 (0.88 to 1.67) | 0.231 | 1.19 (0.75 to 1.88) | 0.462 | 1.18 (0.80 to 1.73) | 0.402 |
| Cog | 0.18 (0.03 to 1.26) | 0.084 | 3.29 (2.59 to 4.18) | <0.001 | 0.58 (0.22 to 1.57) | 0.285 | 0.36 (0.04 to 3.62) | 0.388 | 1.32 (0.57 to 3.08) | 0.521 | 2.24 (1.36 to 3.70) | 0.002 |
| Phy + Psy | 2.94 (2.49 to 3.47) | <0.001 | 2.88 (1.85 to 4.47) | <0.001 | 2.20 (1.60 to 3.03) | <0.001 | 2.31 (1.89 to 2.83) | <0.001 | 2.42 (1.94 to 3.01) | <0.001 | 4.56 (3.70 to 5.63) | <0.001 |
| Phy + Cog | 1.86 (1.17 to 2.98) | 0.009 | 1.37 (0.51 to 3.67) | 0.537 | 1.76 (1.16 to 2.68) | 0.008 | 1.28 (0.51 to 3.24) | 0.597 | 1.25 (0.69 to 2.28) | 0.461 | 3.67 (2.46 to 5.48) | <0.001 |
| Psy + Cog | 1.73 (0.71 to 4.19) | 0.227 | 2.26 (1.52 to 3.36) | <0.001 | 2.16 (0.41 to 11.51) | 0.366 | 2.69 (0.97 to 7.46) | 0.057 | 0.57 (0.07 to 4.52) | 0.596 | 0.63 (0.20 to 1.92) | 0.413 |
| Phy + Psy + Cog | 3.02 (2.13 to 4.27) | <0.001 | 1.01 (1.00 to 1.01) | 0.079 | 1.04 (0.57 to 1.89) | 0.899 | 1.00 (0.99 to 1.00) | 0.290 | 2.31 (1.49 to 3.57) | <0.001 | 3.00 (2.15 to 4.18) | <0.001 |

Appendix Table 7. The association between multimorbidity and outpatient visits by country (continued).

| Multimorbidity | Slovakia | |
| --- | --- | --- |
| Odds ratio (95% CI) | P |
| None (Ref) |  |  |
| Phy | 1.80 (1.57 to 2.07) | <0.001 |
| Psy | 1.79 (1.40 to 2.29) | <0.001 |
| Cog | 1.16 (0.43 to 3.11) | 0.765 |
| Phy + Psy | 2.83 (2.38 to 3.36) | <0.001 |
| Phy + Cog | 0.67 (0.23 to 1.97) | 0.464 |
| Psy + Cog | 1.18 (0.22 to 6.27) | 0.845 |
| Phy + Psy + Cog | 2.33 (1.64 to 3.31) | <0.001 |
| *Note:* Cog: cognitive disorder; Psy: psychological disorder; Phy: physical condition; Psy + Cog: psychological-cognitive multimorbidity; Phy + Cog: physical-cognitive multimorbidity; Phy + Psy: physical- psychological multimorbidity; Phy + Psy + Cog: physical-psychological-cognitive multimorbidity. These are estimated by random effect Poisson regression model. | | |

Appendix Table 8. The association between multimorbidity and inpatient by country.

| Multimorbidity | United States | | China | | Japan | | South Korea | | Mexico | | Austria | |
| --- | --- | --- | --- | --- | --- | --- | --- | --- | --- | --- | --- | --- |
| Odds ratio (95% CI) | P | Odds ratio (95% CI) | P | Odds ratio (95% CI) | P | Odds ratio (95% CI) | P | Odds ratio (95% CI) | P | Odds ratio (95% CI) | P |
| None (Ref) |  |  |  |  |  |  |  |  |  |  |  |  |
| Phy | 3.68 (3.28 to 4.14) | <0.001 | 2.77 (2.14 to 3.57) | <0.001 | 2.45 (1.74 to 3.46) | <0.001 | 2.49 (2.09 to 2.96) | <0.001 | 2.54 (1.77 to 3.65) | <0.001 | 2.09 (1.80 to 2.43) | <0.001 |
| Psy | 1.71 (1.27 to 2.30) | <0.001 | 1.93 (1.54 to 2.41) | <0.001 | 1.49 (0.85 to 2.60) | 0.165 | 1.10 (0.93 to 1.30) | 0.272 | 1.56 (0.89 to 2.72) | 0.117 | 2.28 (1.71 to 3.05) | <0.001 |
| Cog | 1.26 (0.37 to 4.29) | 0.710 | 0.93 (0.67 to 1.29) | 0.667 | 1.34 (0.42 to 4.28) | 0.620 | 1.07 (0.73 to 1.57) | 0.715 | 1.39 (0.76 to 2.52) | 0.281 | 0.48 (0.13 to 1.73) | 0.263 |
| Phy + Psy | 5.77 (5.05 to 6.60) | <0.001 | 4.54 (3.43 to 6.01) | <0.001 | 5.71 (3.28 to 9.96) | <0.001 | 3.29 (2.81 to 3.85) | <0.001 | 4.66 (3.18 to 6.83) | <0.001 | 3.67 (3.06 to 4.41) | <0.001 |
| Phy + Cog | 3.51 (2.67 to 4.61) | <0.001 | 2.55 (1.63 to 3.99) | <0.001 | 4.59 (1.58 to 13.34) | 0.005 | 2.42 (1.89 to 3.11) | <0.001 | 2.59 (1.65 to 4.08) | <0.001 | 1.83 (0.90 to 3.70) | 0.096 |
| Psy + Cog |  |  | 2.43 (1.80 to 3.29) | <0.001 |  |  | 1.35 (1.08 to 1.69) | 0.009 | 2.94 (1.43 to 6.03) | 0.003 | 2.06 (0.61 to 7.02) | 0.247 |
| Phy + Psy + Cog | 4.33 (2.90 to 6.48) | <0.001 | 6.59 (4.40 to 9.86) | <0.001 | 5.64 (1.37 to 23.25) | 0.017 | 3.66 (3.09 to 4.34) | <0.001 | 3.90 (2.51 to 6.05) | <0.001 | 3.34 (1.88 to 5.94) | <0.001 |

Appendix Table 8. The association between multimorbidity and inpatient by country (continued).

| Multimorbidity | Germany | | Sweden | | Netherlands | | Spain | | Italy | | France | |
| --- | --- | --- | --- | --- | --- | --- | --- | --- | --- | --- | --- | --- |
| Odds ratio (95% CI) | P | Odds ratio (95% CI) | P | Odds ratio (95% CI) | P | Odds ratio (95% CI) | P | Odds ratio (95% CI) | P | Odds ratio (95% CI) | P |
| None (Ref) |  |  |  |  |  |  |  |  |  |  |  |  |
| Phy | 2.44 (2.02 to 2.94) | <0.001 | 2.39 (1.93 to 2.96) | <0.001 | 3.06 (2.40 to 3.89) | <0.001 | 2.62 (2.06 to 3.33) | <0.001 | 2.63 (2.05 to 3.36) | <0.001 | 2.72 (2.23 to 3.31) | <0.001 |
| Psy | 1.68 (1.17 to 2.40) | 0.005 | 2.26 (1.54 to 3.31) | <0.001 | 2.07 (1.32 to 3.23) | 0.001 | 1.33 (0.82 to 2.16) | 0.247 | 2.05 (1.39 to 3.04) | <0.001 | 2.04 (1.51 to 2.74) | <0.001 |
| Cog | 1.41 (0.34 to 5.77) | 0.636 | 1.61 (0.32 to 8.04) | 0.564 | 0.80 (0.10 to 6.21) | 0.832 | 1.56 (0.71 to 3.43) | 0.272 | 0.85 (0.25 to 2.91) | 0.795 | 2.91 (1.40 to 6.04) | 0.004 |
| Phy + Psy | 4.74 (3.85 to 5.83) | <0.001 | 4.59 (3.58 to 5.88) | <0.001 | 5.87 (4.43 to 7.77) | <0.001 | 5.52 (4.25 to 7.17) | <0.001 | 5.98 (4.62 to 7.75) | <0.001 | 4.56 (3.71 to 5.61) | <0.001 |
| Phy + Cog | 3.91 (2.26 to 6.76) | <0.001 | 2.72 (1.16 to 6.38) | 0.021 | 4.99 (2.42 to 10.28) | <0.001 | 3.21 (2.13 to 4.84) | <0.001 | 3.56 (2.32 to 5.47) | <0.001 | 3.28 (2.01 to 5.36) | <0.001 |
| Psy + Cog | 3.01 (0.90 to 10.09) | 0.074 |  |  |  |  | 1.39 (0.49 to 3.92) | 0.537 | 4.26 (2.05 to 8.88) | <0.001 | 3.76 (1.67 to 8.46) | 0.001 |
| Phy + Psy + Cog | 3.76 (2.11 to 6.70) | <0.001 | 5.06 (2.38 to 10.74) | <0.001 | 7.91 (3.51 to 17.83) | <0.001 | 7.61 (5.45 to 10.62) | <0.001 | 6.33 (4.53 to 8.83) | <0.001 | 7.05 (4.67 to 10.62) | <0.001 |

Appendix Table 8. The association between multimorbidity and inpatient by country (continued).

| Multimorbidity | Denmark | | Greece | | Switzerland | | Belgium | | Israel | | Czech Republic | |
| --- | --- | --- | --- | --- | --- | --- | --- | --- | --- | --- | --- | --- |
| Odds ratio (95% CI) | P | Odds ratio (95% CI) | P | Odds ratio (95% CI) | P | Odds ratio (95% CI) | P | Odds ratio (95% CI) | P | Odds ratio (95% CI) | P |
| None (Ref) |  |  |  |  |  |  |  |  |  |  |  |  |
| Phy | 2.48 (1.95 to 3.14) | <0.001 | 2.56 (1.73 to 3.78) | <0.001 | 2.45 (2.04 to 2.95) | <0.001 | 1.99 (1.69 to 2.35) | <0.001 | 3.63 (2.23 to 5.89) | <0.001 | 2.59 (2.15 to 3.11) | <0.001 |
| Psy | 3.34 (2.15 to 5.19) | <0.001 | 1.29 (0.66 to 2.51) | 0.461 | 1.27 (0.85 to 1.89) | 0.244 | 2.10 (1.61 to 2.75) | <0.001 | 2.95 (1.32 to 6.59) | 0.008 | 2.65 (1.90 to 3.70) | <0.001 |
| Cog |  |  | 1.48 (0.40 to 5.51) | 0.555 | 0.52 (0.08 to 3.46) | 0.496 | 1.61 (0.66 to 3.92) | 0.296 |  |  | 1.18 (0.24 to 5.72) | 0.835 |
| Phy + Psy | 5.25 (3.99 to 6.91) | <0.001 | 6.21 (4.06 to 9.50) | <0.001 | 4.11 (3.27 to 5.17) | <0.001 | 3.19 (2.65 to 3.84) | <0.001 | 7.39 (4.28 to 12.76) | <0.001 | 4.49 (3.67 to 5.49) | <0.001 |
| Phy + Cog | 7.30 (3.24 to 16.43) | <0.001 | 3.24 (1.54 to 6.84) | 0.002 | 2.08 (0.70 to 6.23) | 0.190 | 1.50 (0.83 to 2.70) | 0.177 | 3.00 (1.05 to 8.59) | 0.040 | 3.01 (1.79 to 5.05) | <0.001 |
| Psy + Cog | 13.40 (1.55 to 115.55) | 0.018 | 0.70 (0.08 to 5.92) | 0.742 | 3.15 (0.20 to 49.04) | 0.413 | 2.39 (0.79 to 7.26) | 0.123 |  |  | 0.49 (0.08 to 3.23) | 0.462 |
| Phy + Psy + Cog | 4.76 (1.57 to 14.45) | 0.006 | 8.28 (4.65 to 14.72) | <0.001 | 1.55 (0.53 to 4.57) | 0.427 | 4.24 (2.59 to 6.92) | <0.001 | 6.50 (2.91 to 14.54) | <0.001 | 7.80 (5.01 to 12.15) | <0.001 |

Appendix Table 8. The association between multimorbidity and inpatient by country (continued).

| Multimorbidity | Poland | | Luxembourg | | Hungary | | Portugal | | Slovenia | | Estonia | |
| --- | --- | --- | --- | --- | --- | --- | --- | --- | --- | --- | --- | --- |
| Odds ratio (95% CI) | P | Odds ratio (95% CI) | P | Odds ratio (95% CI) | P | Odds ratio (95% CI) | P | Odds ratio (95% CI) | P | Odds ratio (95% CI) | P |
| None (Ref) |  |  |  |  |  |  |  |  |  |  |  |  |
| Phy | 3.01 (2.09 to 4.34) | <0.001 | 2.41 (1.73 to 3.36) | <0.001 | 2.93 (2.00 to 4.30) | <0.001 | 2.99 (1.46 to 6.12) | 0.003 | 2.45 (2.00 to 2.99) | <0.001 | 2.49 (2.05 to 3.04) | <0.001 |
| Psy | 2.11 (1.20 to 3.70) | 0.009 | 1.71 (0.94 to 3.14) | 0.080 | 2.48 (1.30 to 4.72) | 0.006 | 0.80 (0.23 to 2.81) | 0.725 | 2.31 (1.66 to 3.22) | <0.001 | 1.83 (1.33 to 2.53) | <0.001 |
| Cog | 1.60 (0.32 to 7.97) | 0.566 | 2.39 (0.53 to 10.72) | 0.256 | 0.92 (0.09 to 8.85) | 0.940 | 0.76 (0.10 to 5.69) | 0.788 | 0.33 (0.04 to 2.80) | 0.310 | 0.83 (0.21 to 3.35) | 0.798 |
| Phy + Psy | 4.24 (2.91 to 6.19) | <0.001 | 3.91 (2.71 to 5.64) | <0.001 | 5.36 (3.56 to 8.07) | <0.001 | 6.18 (2.94 to 12.99) | <0.001 | 3.72 (2.96 to 4.67) | <0.001 | 4.31 (3.51 to 5.29) | <0.001 |
| Phy + Cog | 2.72 (1.38 to 5.35) | 0.004 | 2.88 (1.20 to 6.95) | 0.018 | 2.81 (1.08 to 7.34) | 0.035 | 2.97 (0.69 to 12.72) | 0.143 | 1.95 (0.95 to 3.97) | 0.068 | 3.06 (1.73 to 5.42) | <0.001 |
| Psy + Cog |  |  | 1.31 (0.13 to 13.66) | 0.820 | 2.05 (0.32 to 12.95) | 0.446 | 0.95 (0.05 to 17.25) | 0.970 | 3.98 (1.04 to 15.24) | 0.044 | 2.77 (0.95 to 8.10) | 0.062 |
| Phy + Psy + Cog | 3.67 (2.10 to 6.39) | <0.001 | 4.16 (1.72 to 10.04) | 0.002 | 3.72 (2.00 to 6.90) | <0.001 | 8.02 (2.89 to 22.20) | <0.001 | 2.71 (1.53 to 4.80) | 0.001 | 4.84 (3.32 to 7.07) | <0.001 |

Appendix Table 8. The association between multimorbidity and inpatient by country (continued).

| Multimorbidity | Croatia | | Lithuania | | Bulgaria | | Cyprus | | Finland | | Latvia | |
| --- | --- | --- | --- | --- | --- | --- | --- | --- | --- | --- | --- | --- |
| Odds ratio (95% CI) | P | Odds ratio (95% CI) | P | Odds ratio (95% CI) | P | Odds ratio (95% CI) | P | Odds ratio (95% CI) | P | Odds ratio (95% CI) | P |
| None (Ref) |  |  |  |  |  |  |  |  |  |  |  |  |
| Phy | 2.36 (1.63 to 3.43) | <0.001 | 2.61 (1.55 to 4.40) | <0.001 | 2.48 (1.12 to 5.47) | 0.025 | 1.39 (0.38 to 5.03) | 0.620 | 1.72 (0.92 to 3.20) | 0.087 | 1.93 (0.01 to 287.18) | 0.797 |
| Psy | 2.65 (1.48 to 4.75) | 0.001 | 2.25 (0.92 to 5.48) | 0.076 | 1.59 (0.27 to 9.54) | 0.609 |  |  | 0.83 (0.22 to 3.07) | 0.782 | 3.15 (0.00 to 3005.31) | 0.743 |
| Cog |  |  |  |  | 6.72 (2.90 to 15.56) | <0.001 |  |  |  |  | 2.73 (0.00 to 2.52e+07) | 0.902 |
| Phy + Psy | 3.81 (2.53 to 5.73) | <0.001 | 5.95 (3.50 to 10.12) | <0.001 | 2.59 (0.49 to 13.66) | 0.261 | 2.22 (0.52 to 9.50) | 0.282 | 2.30 (1.19 to 4.43) | 0.013 | 3.10 (0.00 to 22349.38) | 0.803 |
| Phy + Cog | 2.05 (0.62 to 6.75) | 0.236 | 2.40 (0.62 to 9.26) | 0.202 |  |  | 1.71 (0.28 to 10.50) | 0.562 |  |  | 0.74 (0.06 to 9.57) | 0.818 |
| Psy + Cog | 3.56 (0.60 to 21.24) | 0.164 |  |  | 3.46 (1.01 to 11.83) | 0.048 |  |  | 1.59 (0.16 to 16.25) | 0.696 |  |  |
| Phy + Psy + Cog | 4.15 (2.05 to 8.40) | <0.001 | 9.52 (3.73 to 24.28) | <0.001 | 0.98 (0.96 to 1.01) | 0.137 | 0.59 (0.05 to 6.99) | 0.672 | 1.03 (1.00 to 1.05) | 0.068 | 3.34 (0.00 to 300746.51) | 0.836 |

Appendix Table 8. The association between multimorbidity and inpatient by country (continued).

| Multimorbidity | Romania | | Slovakia | |
| --- | --- | --- | --- | --- |
| Odds ratio (95% CI) | P | Odds ratio (95% CI) | P |
| None (Ref) |  |  |  |  |
| Phy | 2.68 (0.06 to 127.45) | 0.617 | 6.13 (0.20 to 192.16) | 0.302 |
| Psy | 0.73 (0.13 to 4.20) | 0.724 | 3.49 (0.21 to 58.21) | 0.384 |
| Cog | 5.72 (0.00 to 15493.72) | 0.666 |  |  |
| Phy + Psy | 6.49 (0.00 to 36707.45) | 0.671 | 67.04 (0.03 to 128966.06) | 0.276 |
| Phy + Cog | 4.73 (0.00 to 10052.78) | 0.691 | 13.84 (0.04 to 4314.39) | 0.370 |
| Psy + Cog | 2.21 (0.31 to 15.85) | 0.431 |  |  |
| Phy + Psy + Cog | 6.98 (0.00 to 81346.43) | 0.684 | 27.62 (0.05 to 14014.44) | 0.296 |
| *Note:* Cog: cognitive disorder; Psy: psychological disorder; Phy: physical condition; Psy + Cog: psychological-cognitive multimorbidity; Phy + Cog: physical-cognitive multimorbidity; Phy + Psy: physical- psychological multimorbidity; Phy + Psy + Cog: physical-psychological-cognitive multimorbidity. These are estimated by random effect logit model. | | | | |

Appendix Table 9. The association between multimorbidity and inpatient visits by country.

| Multimorbidity | United States | | China | | Japan | | South Korea | | Austria | | Germany | |
| --- | --- | --- | --- | --- | --- | --- | --- | --- | --- | --- | --- | --- |
| Odds ratio (95% CI) | P | Odds ratio (95% CI) | P | Odds ratio (95% CI) | P | Odds ratio (95% CI) | P | Odds ratio (95% CI) | P | Odds ratio (95% CI) | P |
| None (Ref) |  |  |  |  |  |  |  |  |  |  |  |  |
| Phy | 3.22 (2.91 to 3.57) | <0.001 | 2.35 (1.93 to 2.85) | <0.001 | 2.14 (1.70 to 2.71) | <0.001 | 2.25 (1.93 to 2.63) | <0.001 | 1.91 (1.69 to 2.15) | <0.001 | 2.25 (1.93 to 2.63) | <0.001 |
| Psy | 1.68 (1.30 to 2.17) | <0.001 | 1.82 (1.51 to 2.19) | <0.001 | 1.42 (0.89 to 2.26) | 0.144 | 1.11 (0.96 to 1.30) | 0.164 | 2.00 (1.60 to 2.49) | <0.001 | 1.56 (1.17 to 2.09) | 0.003 |
| Cog | 1.23 (0.44 to 3.49) | 0.691 | 0.95 (0.72 to 1.26) | 0.738 | 1.37 (0.51 to 3.73) | 0.531 | 1.07 (0.76 to 1.50) | 0.713 | 0.59 (0.19 to 1.82) | 0.357 | 1.35 (0.43 to 4.23) | 0.601 |
| Phy + Psy | 4.63 (4.14 to 5.17) | <0.001 | 3.54 (2.92 to 4.30) | <0.001 | 4.07 (3.02 to 5.48) | <0.001 | 3.01 (2.61 to 3.46) | <0.001 | 3.06 (2.67 to 3.50) | <0.001 | 3.86 (3.27 to 4.55) | <0.001 |
| Phy + Cog | 3.32 (2.71 to 4.06) | <0.001 | 2.37 (1.68 to 3.34) | <0.001 | 3.42 (1.66 to 7.04) | 0.001 | 2.29 (1.86 to 2.82) | <0.001 | 1.67 (1.04 to 2.68) | 0.032 | 3.39 (2.32 to 4.98) | <0.001 |
| Psy + Cog | 0.00 (0.00 to .) | 0.997 | 2.17 (1.72 to 2.74) | <0.001 | 0.00 (0.00 to .) | 1.000 | 1.41 (1.15 to 1.71) | 0.001 | 1.75 (0.79 to 3.88) | 0.168 | 3.51 (1.38 to 8.96) | 0.008 |
| Phy + Psy + Cog | 3.94 (3.01 to 5.18) | <0.001 | 4.55 (3.52 to 5.90) | <0.001 | 4.01 (1.62 to 9.90) | 0.003 | 3.33 (2.87 to 3.87) | <0.001 | 2.84 (2.03 to 3.99) | <0.001 | 3.12 (2.09 to 4.64) | <0.001 |

Appendix Table 9. The association between multimorbidity and inpatient visits by country (continued).

| Multimorbidity | Sweden | | Netherlands | | Spain | | Italy | | France | | Denmark | |
| --- | --- | --- | --- | --- | --- | --- | --- | --- | --- | --- | --- | --- |
| Odds ratio (95% CI) | P | Odds ratio (95% CI) | P | Odds ratio (95% CI) | P | Odds ratio (95% CI) | P | Odds ratio (95% CI) | P | Odds ratio (95% CI) | P |
| None (Ref) |  |  |  |  |  |  |  |  |  |  |  |  |
| Phy | 2.29 (1.89 to 2.78) | <0.001 | 2.87 (2.32 to 3.55) | <0.001 | 2.44 (1.98 to 3.00) | <0.001 | 2.54 (2.03 to 3.17) | <0.001 | 2.50 (2.09 to 2.99) | <0.001 | 2.38 (1.93 to 2.94) | <0.001 |
| Psy | 2.12 (1.50 to 2.99) | <0.001 | 2.02 (1.36 to 2.99) | <0.001 | 1.34 (0.88 to 2.04) | 0.171 | 1.97 (1.37 to 2.83) | <0.001 | 1.92 (1.47 to 2.52) | <0.001 | 3.11 (2.16 to 4.47) | <0.001 |
| Cog | 1.55 (0.38 to 6.27) | 0.539 | 0.90 (0.13 to 6.44) | 0.916 | 1.51 (0.74 to 3.10) | 0.257 | 0.85 (0.27 to 2.67) | 0.776 | 2.63 (1.43 to 4.85) | 0.002 | 0.00 (0.00 to .) | 1.000 |
| Phy + Psy | 4.02 (3.24 to 4.97) | <0.001 | 5.03 (3.98 to 6.37) | <0.001 | 4.57 (3.68 to 5.67) | <0.001 | 5.20 (4.15 to 6.51) | <0.001 | 4.00 (3.33 to 4.82) | <0.001 | 4.56 (3.62 to 5.74) | <0.001 |
| Phy + Cog | 2.72 (1.47 to 5.04) | 0.001 | 4.11 (2.35 to 7.20) | <0.001 | 2.99 (2.13 to 4.19) | <0.001 | 3.38 (2.34 to 4.88) | <0.001 | 2.92 (1.99 to 4.31) | <0.001 | 4.80 (2.80 to 8.23) | <0.001 |
| Psy + Cog | 0.00 (0.00 to .) | 1.000 | 0.00 (0.00 to .) | 1.000 | 1.34 (0.55 to 3.29) | 0.520 | 3.73 (2.05 to 6.81) | <0.001 | 3.41 (1.80 to 6.48) | <0.001 | 7.08 (1.83 to 27.43) | 0.005 |
| Phy + Psy + Cog | 3.88 (2.32 to 6.47) | <0.001 | 6.22 (3.60 to 10.73) | <0.001 | 5.72 (4.42 to 7.41) | <0.001 | 5.61 (4.24 to 7.41) | <0.001 | 5.47 (4.06 to 7.36) | <0.001 | 3.99 (1.86 to 8.56) | <0.001 |

Appendix Table 9. The association between multimorbidity and inpatient visits by country (continued).

| Multimorbidity | Greece | | Switzerland | | Belgium | | Israel | | Czech Republic | | Poland | |
| --- | --- | --- | --- | --- | --- | --- | --- | --- | --- | --- | --- | --- |
| Odds ratio (95% CI) | P | Odds ratio (95% CI) | P | Odds ratio (95% CI) | P | Odds ratio (95% CI) | P | Odds ratio (95% CI) | P | Odds ratio (95% CI) | P |
| None (Ref) |  |  |  |  |  |  |  |  |  |  |  |  |
| Phy | 2.51 (1.78 to 3.55) | <0.001 | 2.25 (1.92 to 2.64) | <0.001 | 1.88 (1.63 to 2.16) | <0.001 | 3.28 (2.12 to 5.06) | <0.001 | 2.37 (2.02 to 2.79) | <0.001 | 2.77 (1.99 to 3.85) | <0.001 |
| Psy | 1.29 (0.70 to 2.36) | 0.416 | 1.25 (0.87 to 1.79) | 0.237 | 1.97 (1.58 to 2.46) | <0.001 | 2.79 (1.39 to 5.60) | 0.004 | 2.43 (1.84 to 3.21) | <0.001 | 2.01 (1.22 to 3.33) | 0.007 |
| Cog | 1.44 (0.45 to 4.66) | 0.540 | 0.55 (0.08 to 3.90) | 0.546 | 1.52 (0.72 to 3.20) | 0.274 | 0.00 (0.00 to .) | 1.000 | 1.22 (0.30 to 4.91) | 0.777 | 1.52 (0.37 to 6.29) | 0.564 |
| Phy + Psy | 5.09 (3.56 to 7.28) | <0.001 | 3.50 (2.92 to 4.20) | <0.001 | 2.78 (2.39 to 3.22) | <0.001 | 6.09 (3.87 to 9.58) | <0.001 | 3.82 (3.22 to 4.54) | <0.001 | 3.74 (2.68 to 5.22) | <0.001 |
| Phy + Cog | 2.70 (1.48 to 4.93) | 0.001 | 1.90 (0.79 to 4.62) | 0.154 | 1.42 (0.90 to 2.25) | 0.132 | 2.82 (1.20 to 6.63) | 0.018 | 2.68 (1.80 to 4.00) | <0.001 | 2.48 (1.42 to 4.35) | 0.001 |
| Psy + Cog | 0.78 (0.11 to 5.72) | 0.811 | 4.48 (0.65 to 30.59) | 0.126 | 2.11 (0.88 to 5.05) | 0.095 | 0.00 (0.00 to .) | 1.000 | 0.59 (0.08 to 4.11) | 0.594 | 0.00 (0.00 to .) | 1.000 |
| Phy + Psy + Cog | 6.26 (4.03 to 9.72) | <0.001 | 1.45 (0.59 to 3.55) | 0.415 | 3.28 (2.38 to 4.53) | <0.001 | 5.83 (3.16 to 10.77) | <0.001 | 5.59 (4.16 to 7.51) | <0.001 | 3.35 (2.15 to 5.22) | <0.001 |

Appendix Table 9. The association between multimorbidity and inpatient visits by country (continued).

| Multimorbidity | Luxembourg | | Hungary | | Portugal | | Slovenia | | Estonia | | Croatia | |
| --- | --- | --- | --- | --- | --- | --- | --- | --- | --- | --- | --- | --- |
| Odds ratio (95% CI) | P | Odds ratio (95% CI) | P | Odds ratio (95% CI) | P | Odds ratio (95% CI) | P | Odds ratio (95% CI) | P | Odds ratio (95% CI) | P |
| None (Ref) |  |  |  |  |  |  |  |  |  |  |  |  |
| Phy | 2.28 (1.67 to 3.11) | <0.001 | 2.63 (1.85 to 3.73) | <0.001 | 2.12 (1.30 to 3.46) | 0.003 | 2.28 (1.91 to 2.72) | <0.001 | 2.35 (1.97 to 2.81) | <0.001 | 2.26 (1.62 to 3.16) | <0.001 |
| Psy | 1.74 (1.00 to 3.02) | 0.048 | 2.38 (1.36 to 4.14) | 0.002 | 0.83 (0.34 to 2.07) | 0.694 | 2.10 (1.58 to 2.80) | <0.001 | 1.74 (1.30 to 2.31) | <0.001 | 2.60 (1.56 to 4.35) | <0.001 |
| Cog | 2.05 (0.64 to 6.60) | 0.228 | 0.94 (0.13 to 6.85) | 0.948 | 0.44 (0.06 to 3.31) | 0.427 | 0.35 (0.05 to 2.49) | 0.293 | 0.96 (0.24 to 3.86) | 0.951 | 0.00 (0.00 to .) | 1.000 |
| Phy + Psy | 3.52 (2.54 to 4.87) | <0.001 | 4.41 (3.09 to 6.28) | <0.001 | 3.28 (2.00 to 5.39) | <0.001 | 3.22 (2.65 to 3.92) | <0.001 | 3.79 (3.16 to 4.54) | <0.001 | 3.43 (2.42 to 4.88) | <0.001 |
| Phy + Cog | 2.82 (1.39 to 5.73) | 0.004 | 2.63 (1.17 to 5.91) | 0.019 | 1.65 (0.61 to 4.42) | 0.321 | 1.79 (1.01 to 3.16) | 0.046 | 2.80 (1.77 to 4.43) | <0.001 | 2.07 (0.74 to 5.80) | 0.166 |
| Psy + Cog | 1.36 (0.19 to 9.90) | 0.759 | 1.81 (0.43 to 7.60) | 0.415 | 0.96 (0.13 to 7.26) | 0.972 | 3.26 (1.21 to 8.78) | 0.020 | 2.76 (1.14 to 6.72) | 0.025 | 3.60 (0.88 to 14.74) | 0.074 |
| Phy + Psy + Cog | 3.54 (1.85 to 6.78) | <0.001 | 3.37 (2.01 to 5.65) | <0.001 | 4.14 (2.21 to 7.73) | <0.001 | 2.53 (1.61 to 3.98) | <0.001 | 4.10 (3.06 to 5.49) | <0.001 | 3.69 (2.09 to 6.50) | <0.001 |

Appendix Table 9. The association between multimorbidity and inpatient visits by country (continued).

| Multimorbidity | Lithuania | | Bulgaria | | Cyprus | | Finland | | Latvia | | Romania | |
| --- | --- | --- | --- | --- | --- | --- | --- | --- | --- | --- | --- | --- |
| Odds ratio (95% CI) | P | Odds ratio (95% CI) | P | Odds ratio (95% CI) | P | Odds ratio (95% CI) | P | Odds ratio (95% CI) | P | Odds ratio (95% CI) | P |
| None (Ref) |  |  |  |  |  |  |  |  |  |  |  |  |
| Phy | 2.48 (1.51 to 4.08) | <0.001 | 2.41 (1.13 to 5.15) | 0.023 | 1.38 (0.39 to 4.94) | 0.618 | 1.68 (0.94 to 3.03) | 0.082 | 1.87 (0.87 to 4.02) | 0.109 | 2.51 (1.49 to 4.21) | 0.001 |
| Psy | 2.15 (0.94 to 4.94) | 0.070 | 1.68 (0.34 to 8.18) | 0.522 | 0.00 (0.00 to .) | 1.000 | 0.89 (0.25 to 3.10) | 0.852 | 2.97 (0.89 to 9.96) | 0.078 | 0.75 (0.22 to 2.55) | 0.643 |
| Cog | 0.00 (0.00 to .) | 1.000 | 5.83 (2.63 to 12.94) | <0.001 | 0.00 (0.00 to .) | 1.000 | 4.93 (0.62 to 39.21) | 0.131 | 2.24 (0.27 to 18.75) | 0.456 | 4.71 (1.86 to 11.93) | 0.001 |
| Phy + Psy | 4.99 (3.04 to 8.18) | <0.001 | 2.44 (0.51 to 11.72) | 0.267 | 2.27 (0.57 to 9.11) | 0.247 | 2.27 (1.22 to 4.26) | 0.010 | 2.75 (1.24 to 6.09) | 0.013 | 5.55 (3.28 to 9.41) | <0.001 |
| Phy + Cog | 2.35 (0.69 to 8.00) | 0.170 | 0.00 (0.00 to .) | 1.000 | 1.62 (0.30 to 8.64) | 0.573 | 0.00 (0.00 to .) | 1.000 | 0.77 (0.09 to 6.28) | 0.804 | 3.78 (1.50 to 9.56) | 0.005 |
| Psy + Cog | 0.00 (0.00 to .) | 1.000 | 3.30 (1.08 to 10.14) | 0.037 | 0.00 (0.00 to .) | 1.000 | 2.35 (0.33 to 16.64) | 0.393 | 0.00 (0.00 to .) | 1.000 | 2.14 (0.49 to 9.28) | 0.309 |
| Phy + Psy + Cog | 7.36 (3.43 to 15.78) | <0.001 | 0.98 (0.96 to 1.01) | 0.139 | 0.60 (0.06 to 6.41) | 0.671 | 1.03 (1.00 to 1.05) | 0.030 | 3.25 (1.01 to 10.41) | 0.047 | 5.68 (2.94 to 10.97) | <0.001 |

Appendix Table 9. The association between multimorbidity and inpatient visits by country (continued).

| Multimorbidity | Slovakia | |
| --- | --- | --- |
| Odds ratio (95% CI) | P |
| None (Ref) |  |  |
| Phy | 3.50 (1.61 to 7.60) | 0.002 |
| Psy | 2.86 (0.77 to 10.71) | 0.118 |
| Cog | 0.00 (0.00 to .) | 1.000 |
| Phy + Psy | 11.47 (5.25 to 25.09) | <0.001 |
| Phy + Cog | 6.54 (0.81 to 52.63) | 0.077 |
| Psy + Cog | 0.00 (0.00 to .) | 1.000 |
| Phy + Psy + Cog | 7.30 (2.27 to 23.46) | 0.001 |
| *Note:* Cog: cognitive disorder; Psy: psychological disorder; Phy: physical condition; Psy + Cog: psychological-cognitive multimorbidity; Phy + Cog: physical-cognitive multimorbidity; Phy + Psy: physical- psychological multimorbidity; Phy + Psy + Cog: physical-psychological-cognitive multimorbidity. These are estimated by random effect Poisson regression model. | | |

Appendix Table 10. The meta-analysis details.

| Outcome | Multimorbidity | OR/IRR | Tau | H2 | I2 |
| --- | --- | --- | --- | --- | --- |
| Outpatient | Phy | 5.15 (4.46 to 5.85) | 2.89 | 9.89 | 89.88 |
| Psy | 1.58 (1.40 to 1.77) | 0.13 | 3.08 | 67.49 |
| Cog | 0.53 (0.39 to 0.67) | 0.06 | 2.41 | 58.42 |
| Phy + Psy | 7.80 (6.62 to 8.97) | 6.53 | 8.82 | 88.66 |
| Phy + Cog | 2.49 (1.93 to 3.05) | 0.79 | 2.09 | 52.09 |
| Psy + Cog | 0.90 (0.54 to 1.25) | 0.31 | 4.14 | 75.85 |
| Phy + Psy + Cog | 3.08 (2.22 to 3.94) | 2.28 | 188.67 | 99.47 |
| Inpatient | Phy | 2.54 (2.37 to 2.71) | 0.09 | 1.85 | 45.84 |
| Psy | 1.77 (1.57 to 1.97) | 0.12 | 1.97 | 49.28 |
| Cog | 0.96 (0.77 to 1.14) | 0.00 | 1.00 | 0.00 |
| Phy + Psy | 4.42 (4.04 to 4.79) | 0.52 | 2.42 | 58.72 |
| Phy + Cog | 2.63 (2.28 to 2.97) | 0.13 | 1.19 | 16.08 |
| Psy + Cog | 1.80 (1.27 to 2.34) | 0.36 | 1.58 | 36.69 |
| Phy + Psy + Cog | 4.17 (3.32 to 5.02) | 3.38 | 624.09 | 99.84 |
| Outpatient Number | Phy | 2.02 (1.87 to 2.17) | 0.16 | 41.61 | 97.60 |
| Psy | 1.40 (1.33 to 1.46) | 0.02 | 5.04 | 80.17 |
| Cog | 0.89 (0.75 to 1.04) | 0.12 | 5.83 | 82.84 |
| Phy + Psy | 2.55 (2.38 to 2.72) | 0.20 | 26.96 | 96.29 |
| Phy + Cog | 1.89 (1.75 to 2.03) | 0.09 | 4.16 | 75.98 |
| Psy + Cog | 1.39 (1.19 to 1.59) | 0.14 | 3.34 | 70.08 |
| Phy + Psy + Cog | 2.21 (1.99 to 2.43) | 0.30 | 595.38 | 99.83 |
| Inpatient Number | Phy | 2.35 (2.21 to 2.49) | 0.07 | 2.03 | 50.62 |
| Psy | 1.66 (1.42 to 1.91) | 0.31 | 9.10 | 89.01 |
| Cog | 0.67 (0.40 to 0.94) | 0.28 | - | 100.00 |
| Phy + Psy | 3.79 (3.51 to 4.07) | 0.30 | 2.66 | 62.38 |
| Phy + Cog | 2.28 (1.84 to 2.72) | 0.94 | - | 100.00 |
| Psy + Cog | 0.88 (0.47 to 1.29) | 0.80 | - | 100.00 |
| Phy + Psy + Cog | 3.65 (3.04 to 4.26) | 1.97 | 481.06 | 99.79 |

*Note:* Cog: cognitive disorder; Psy: psychological disorder; Phy: physical condition; Psy + Cog: psychological-cognitive multimorbidity; Phy + Cog: physical-cognitive multimorbidity; Phy + Psy: physical- psychological multimorbidity; Phy + Psy + Cog: physical-psychological-cognitive multimorbidity. Between-study heterogeneity was estimated using the algorithm of the restricted maximum likelihood and was assessed using I2 and H2 statistics. I2 is the percentage of variability in the effect size that is caused by between-study heterogeneity, rather than by sampling error. The H2 statistic describes the ratio of the observed variation and the expected variance due to sampling error.

**Appendix Figures**


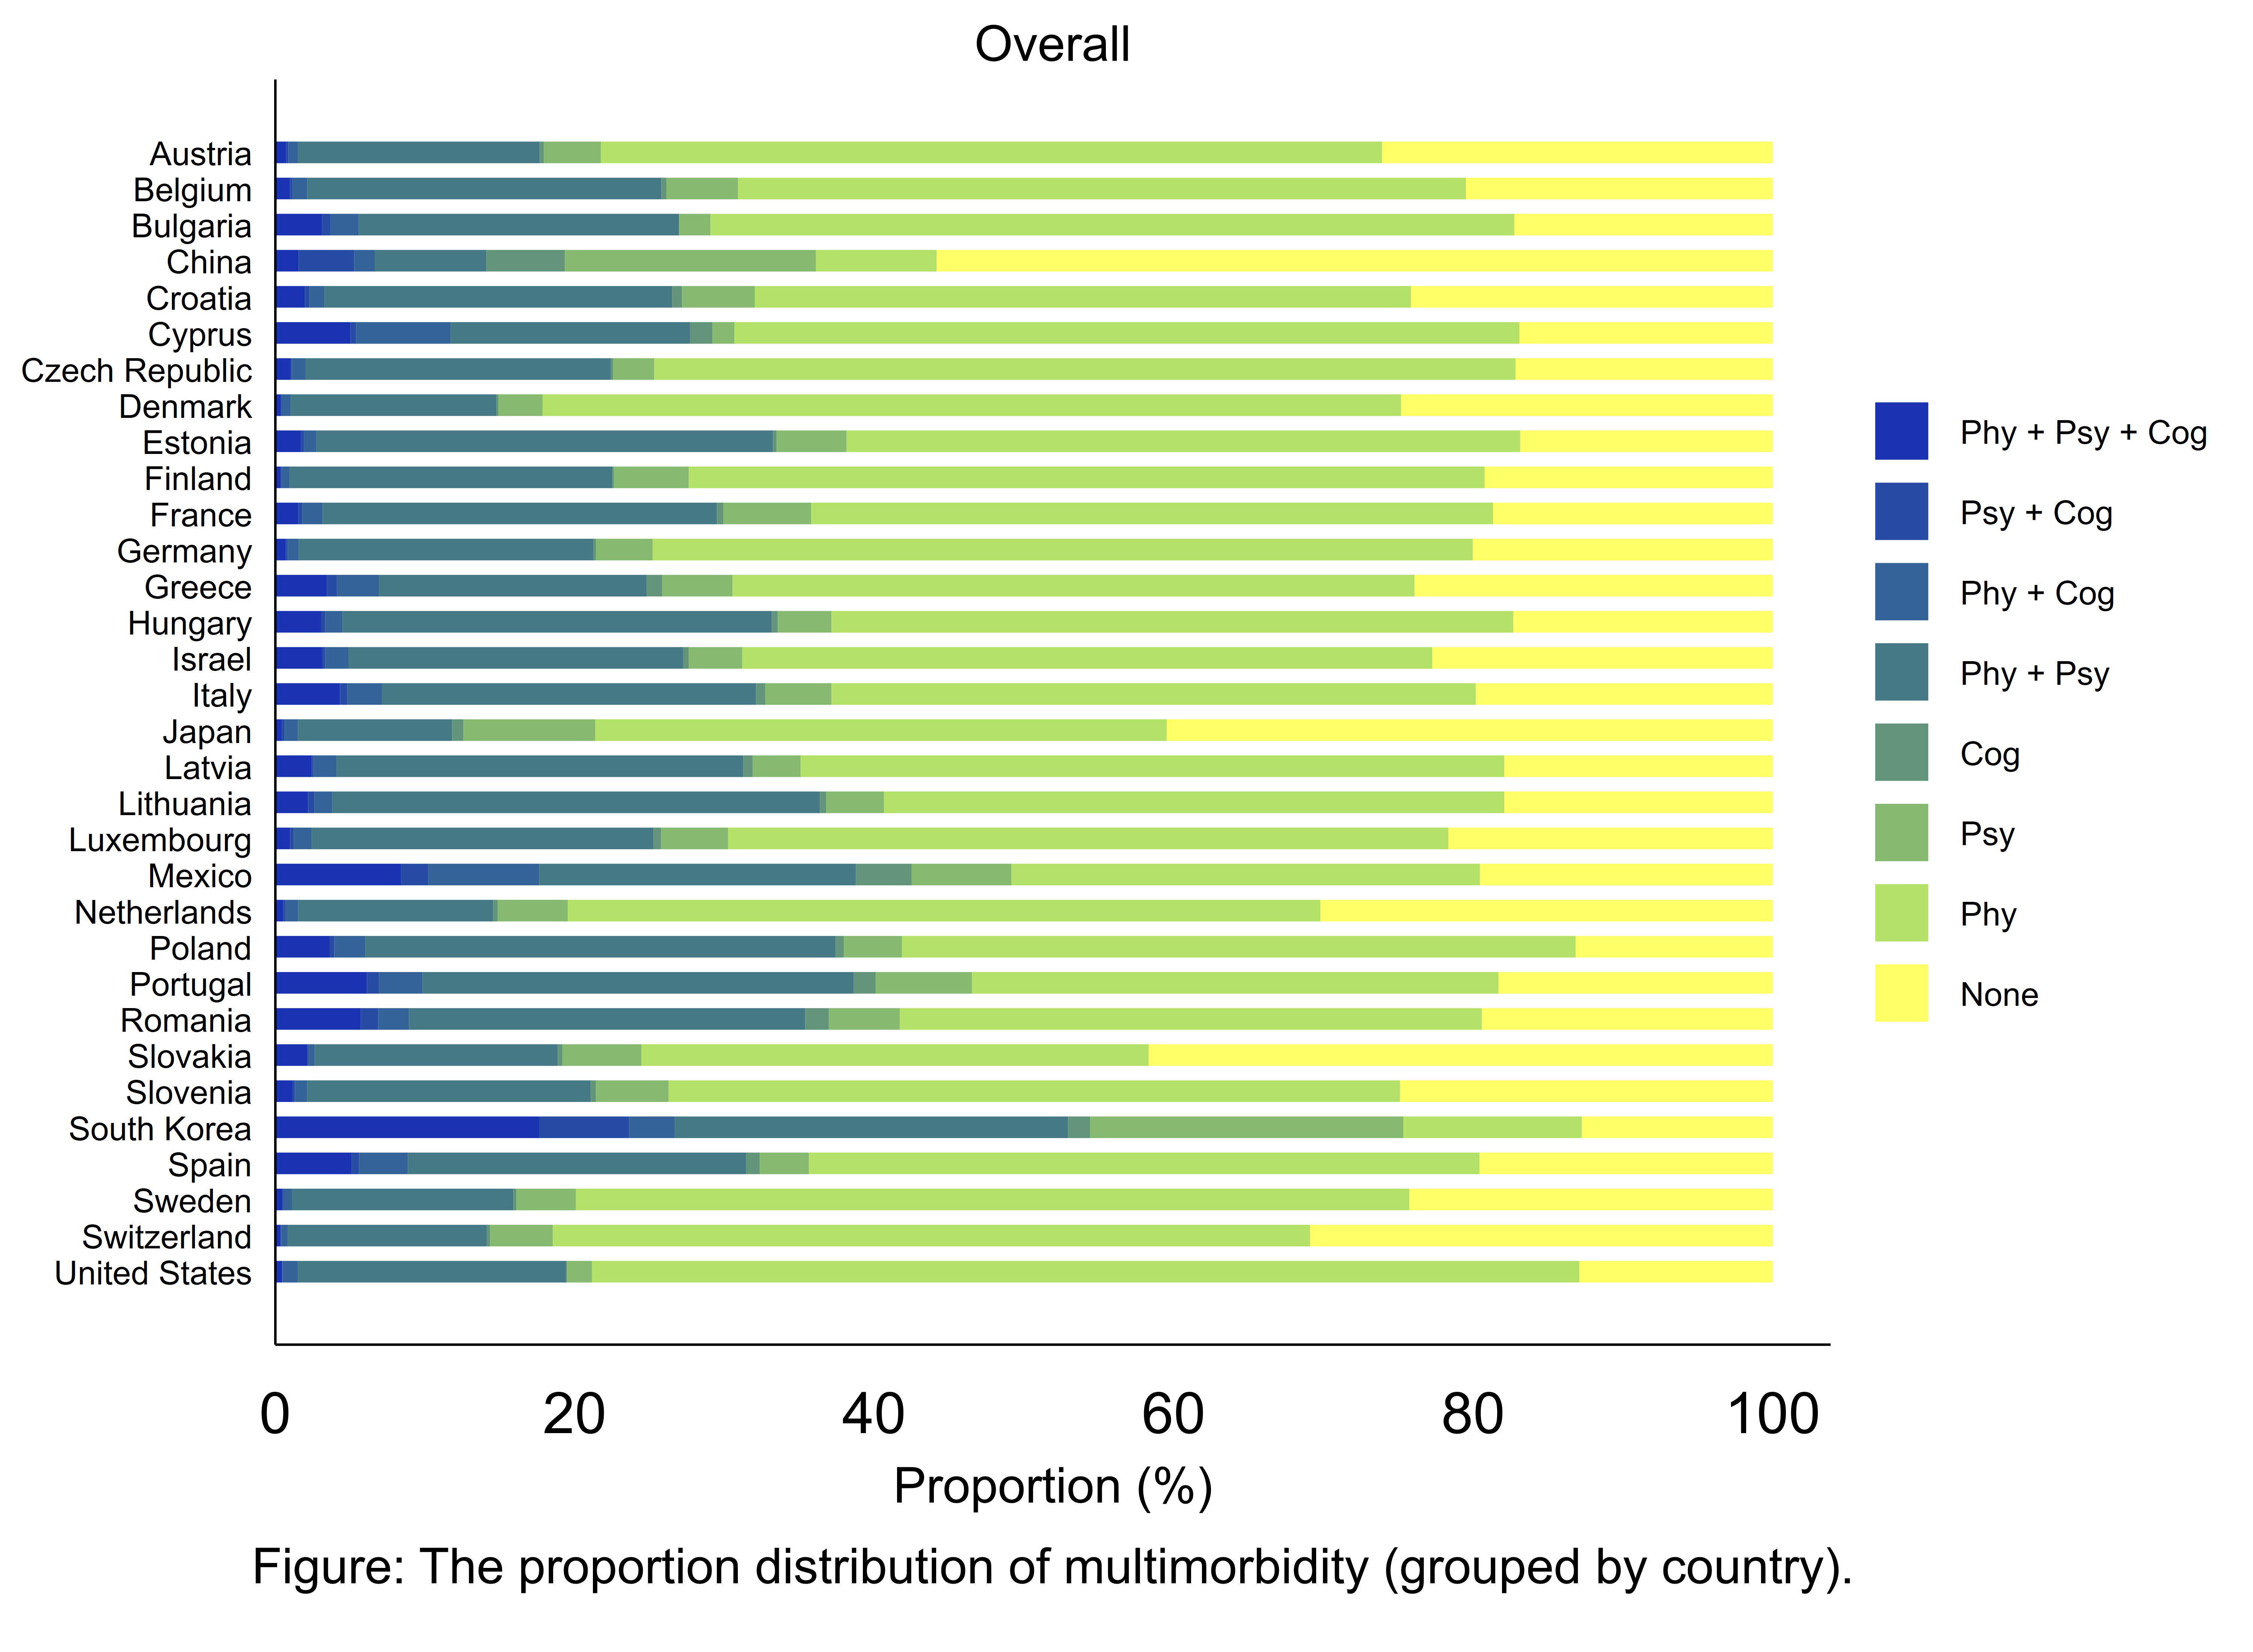


Appendix Figure 1: Prevalence of physical, psychological, and cognitive multimorbidity by country.


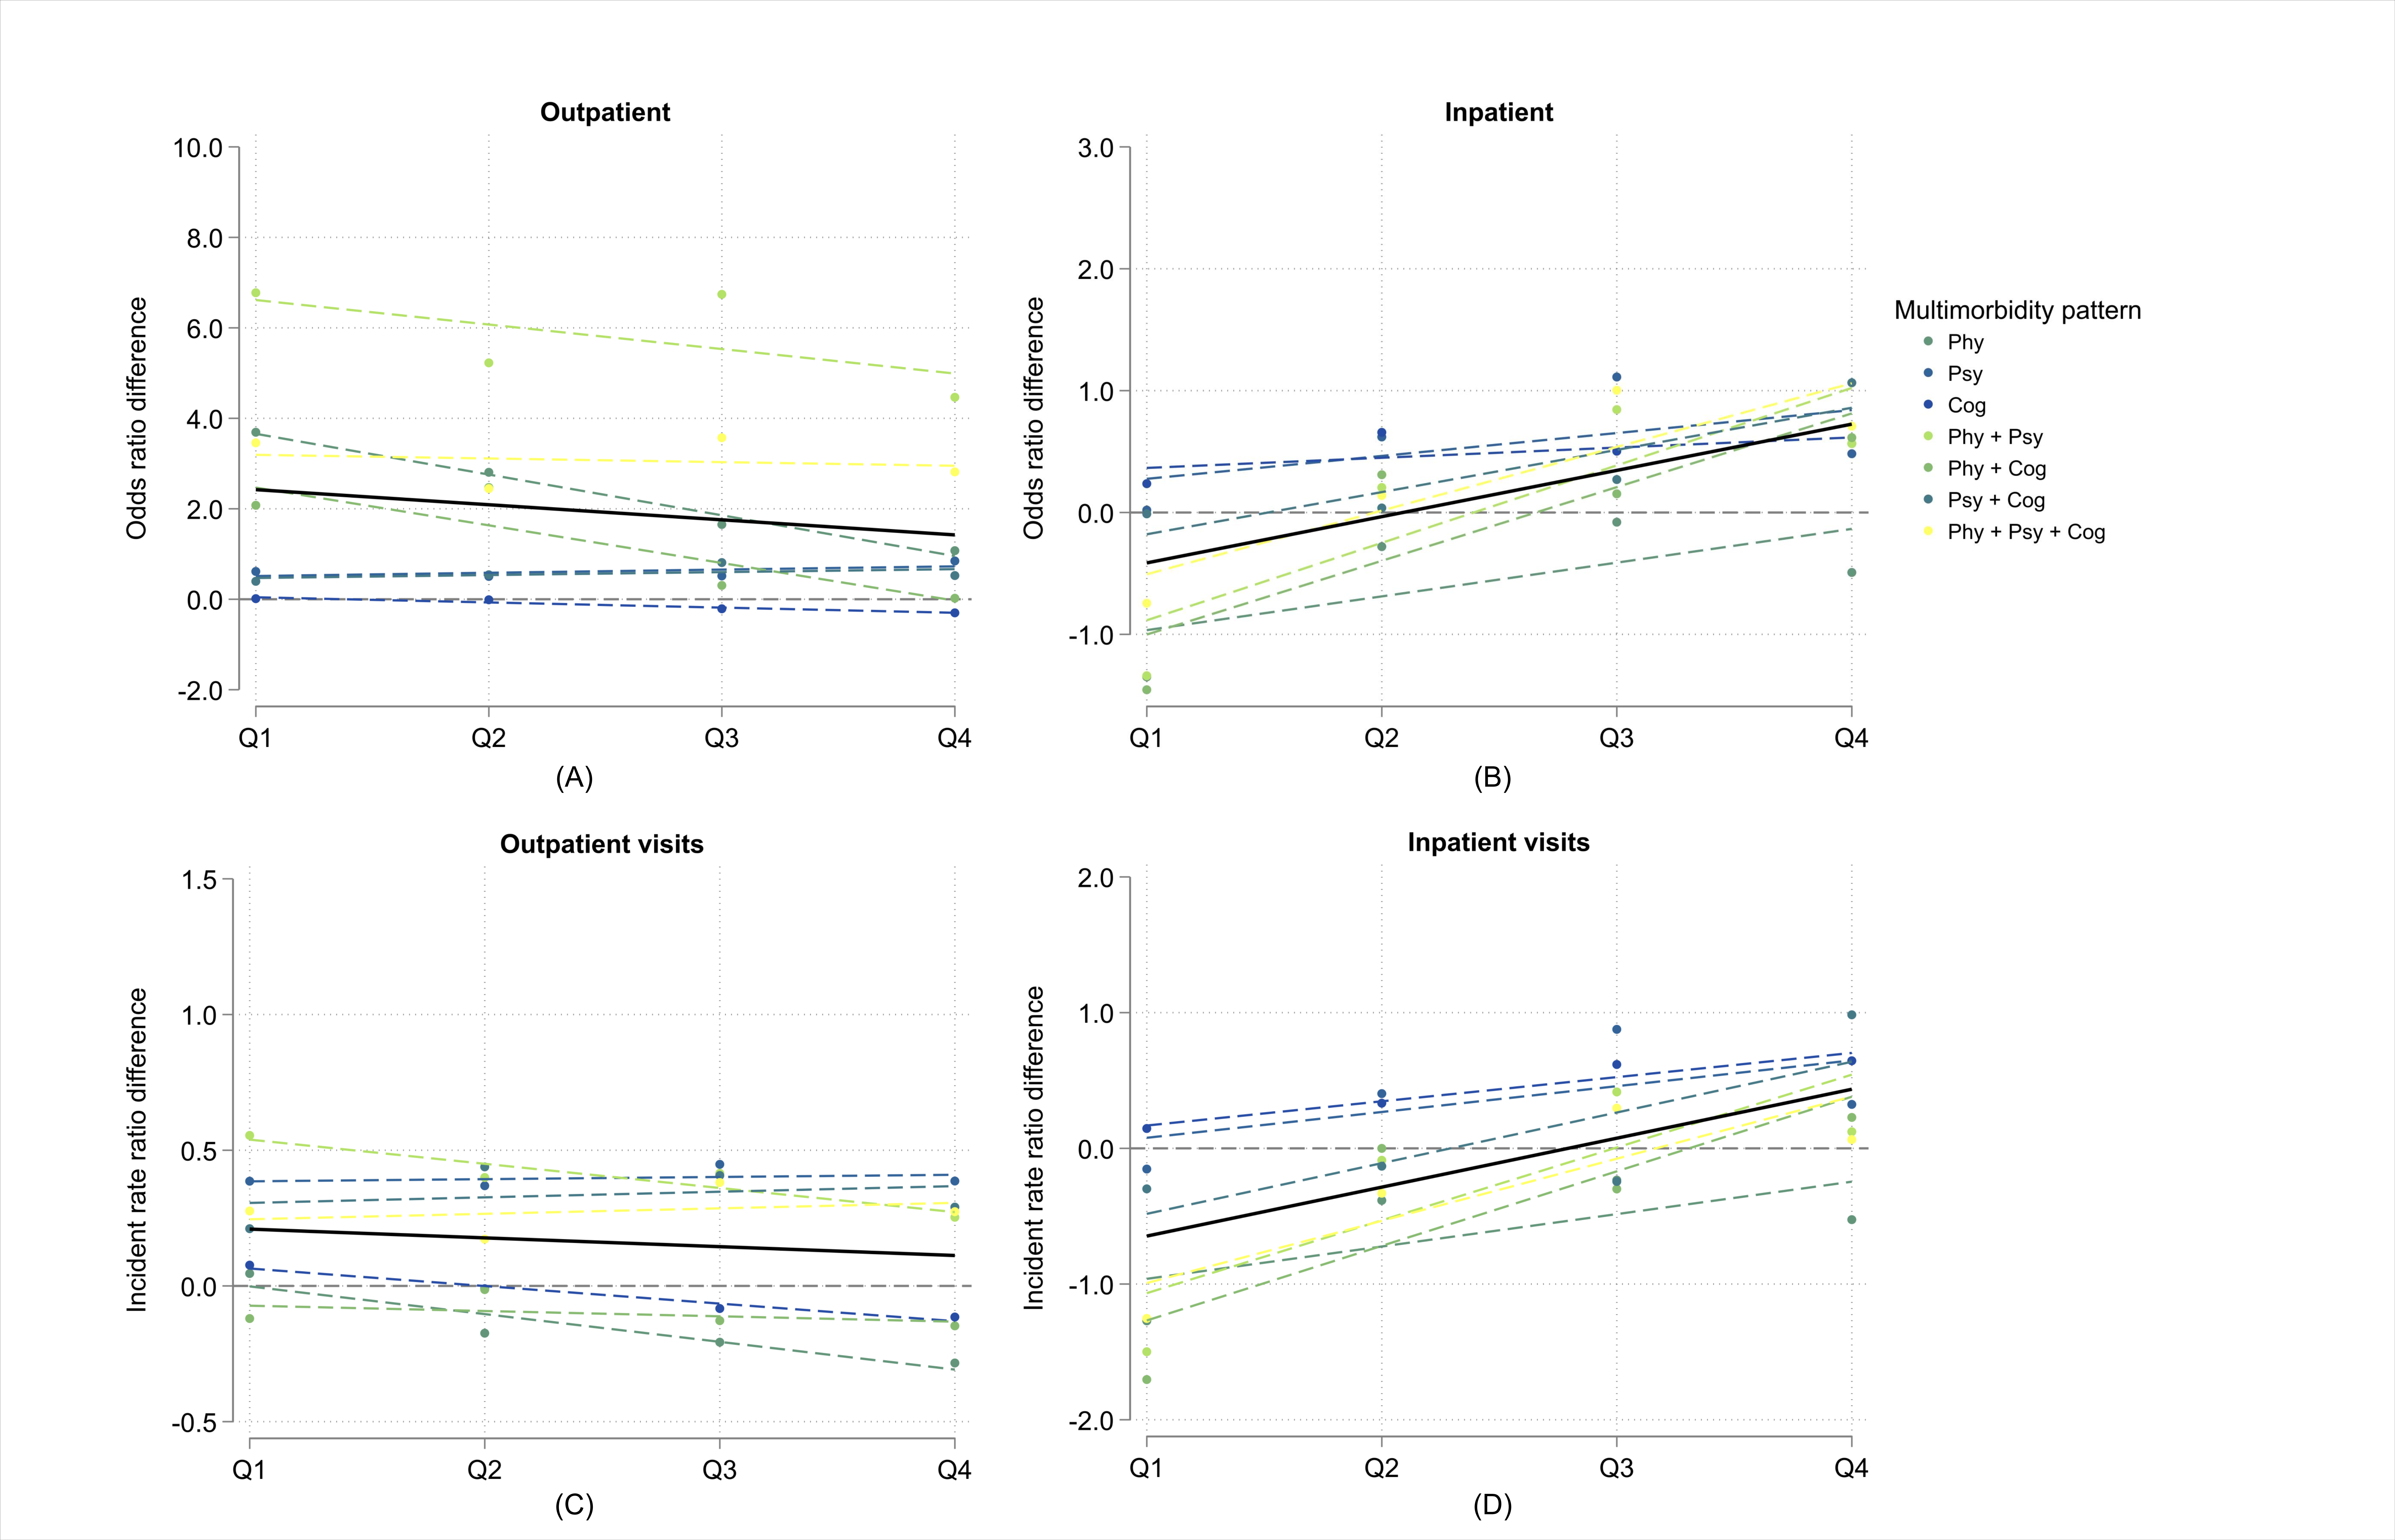


Appendix Figure 2: The OR and IRR differences between individuals with and without health insurance (grouped by multimorbidity and SES).





Appendix Figure 3. The association between health utilization and multimorbidity (sensitivity analyses).

Note: Panel (A) is the result excluded CHARLS; Panel (B) is the result excluded MAHS; Panel (C) and Panel (D) are results using random-effects negative binomial regression models.





Appendix Figure 4. The association between health utilization and multimorbidity (grouped by education attainment).





Appendix Figure 5. The association between health utilization and multimorbidity (multiple imputation).

**Reference**

1. Kozlov, E., Dong, X., Kelley, A. S. & Ankuda, C. K. The Epidemiology of Depressive Symptoms in the Last Year of Life. *Journal of the American Geriatrics Society* **68**, 321–328 (2020).

2. Conde-Sala, J. L., Garre-Olmo, J., Calvó-Perxas, L., Turró-Garriga, O. & Vilalta-Franch, J. Course of depressive symptoms and associated factors in people aged 65+ in Europe: A two-year follow-up. *Journal of Affective Disorders* **245**, 440–450 (2019).

3. Han, C. H., Chung, J. H. & Lee, S. Depression, chronic obstructive pulmonary disease, and healthcare utilization: Results from the Korean Longitudinal Study of Aging (KLoSA). *The Clinical Respiratory Journal* **15**, 937–943 (2021).

4. Yang, X. *et al.* Prospective associations between depressive symptoms and cognitive functions in middle-aged and elderly Chinese adults. *Journal of Affective Disorders* **263**, 692–697 (2020).

5. Zhou, L., Ma, X. & Wang, W. Relationship between Cognitive Performance and Depressive Symptoms in Chinese Older Adults: The China Health and Retirement Longitudinal Study (CHARLS). *Journal of Affective Disorders* **281**, 454–458 (2021).

6. Castellanos-Perilla, N. *et al.* Factors associated with functional loss among community-dwelling Mexican older adults. *Biomédica* **40**, 546–556 (2020).

7. Richardson, R. A., Keyes, K. M., Medina, J. T. & Calvo, E. Sociodemographic inequalities in depression among older adults: cross-sectional evidence from 18 countries. *The Lancet Psychiatry* **7**, 673–681 (2020).

8. Langa, K. M. *et al.* Trends in the prevalence and mortality of cognitive impairment in the United States: Is there evidence of a compression of cognitive morbidity? *Alzheimer’s & Dementia* **4**, 134–144 (2008).

9. Sutin, A. R., Luchetti, M., Stephan, Y. & Terracciano, A. Meaning in life and risk of cognitive impairment: A 9-Year prospective study in 14 countries. *Archives of Gerontology and Geriatrics* **88**, 104033 (2020).

10. Kim, J.-H. & Chon, D. Association between Cognitive Impairment, Vascular Disease and All-Cause Mortality. *The Journal of nutrition, health and aging* **22**, 790–795 (2018).

11. Zhou, S., Song, S., Jin, Y. & Zheng, Z.-J. Prospective association between social engagement and cognitive impairment among middle-aged and older adults: evidence from the China Health and Retirement Longitudinal Study. *BMJ Open* **10**, e040936 (2020).

12. Oba, H., Kadoya, Y., Matsuoka, T. & Narumoto, J. Cognitive decline reduces household spending among older people. *Psychogeriatrics* **20**, 28–34 (2020).
